# 1      **The Arabidopsis ATP-Binding Cassette E protein** 2                    **ABCE2 is a conserved component of the** 3                    **translation machinery**

4  
5  
6      Carla Navarro-Quiles<sup>1</sup>, Eduardo Mateo-Bonmatí<sup>1</sup>, Héctor Candela<sup>1</sup>, Pedro Robles<sup>1</sup>,  
7              Antonio Martínez-Laborda<sup>1</sup>, Yolanda Fernández<sup>2</sup>, Jan Šimura<sup>3</sup>, Karin Ljung<sup>3</sup>,  
8              Vicente Rubio<sup>2</sup>, María Rosa Ponce<sup>1</sup>, and José Luis Micol<sup>1</sup>

9  
10     <sup>1</sup>Instituto de Bioingeniería, Universidad Miguel Hernández, Campus de Elche, Elche  
11     03202, Spain; <sup>2</sup>Centro Nacional de Biotecnología, CNB-CSIC, Madrid 28049, Spain;  
12     <sup>3</sup>Umeå Plant Science Centre, Department of Forest Genetics and Plant Physiology,  
13     Swedish University of Agricultural Sciences, 901 83, Umeå, Sweden

14  
15  
16     Corresponding author: J.L. Micol (telephone: 34 96 665 85 04; fax: 34 96 665 85 11; E-mail:  
17             jlmicol@umh.es)

18  
19  
20  
21  
22  
23  
24  
25  
26     Word count:

27             Main body: 6737

28             Summary: 192

29             Introduction: 616

30             Materials and Methods: 2146

31             Results: 2852

32             Discussion: 1123

33             Acknowledgments: 32

34  
35     Figures: 7

Tables: 0

Supporting Figures: 15

Supporting Tables: 8

36

37 **SUMMARY**

- 38 • ATP-Binding Cassette E (ABCE) proteins dissociate cytoplasmic ribosomes after  
39 translation terminates, and contribute to ribosome recycling, thus linking translation  
40 termination to initiation. This function has been demonstrated to be essential in animals,  
41 fungi, and archaea, but remains unexplored in plants.
- 42 • In most species, ABCE is encoded by a single-copy gene; by contrast, *Arabidopsis*  
43 *thaliana* has two ABCE paralogs, of which ABCE2 seems to conserve the ancestral  
44 function. We isolated *apiculata7-1* (*api7-1*), a viable, hypomorphic allele of ABCE2,  
45 which has a pleiotropic morphological phenotype reminiscent of mutations affecting  
46 ribosome biogenesis factors and ribosomal proteins. We also studied *api7-2*, a null,  
47 recessive lethal allele of ABCE2.
- 48 • Co-immunoprecipitation experiments showed that ABCE2 physically interacts with  
49 components of the translation machinery. An RNA-seq study of the *api7-1* mutant  
50 showed increased responses to iron and sulfur starvation. We also found increased  
51 transcript levels of genes related to auxin signaling and metabolism.
- 52 • Our results support a conserved role for ABCE proteins in ribosome recycling in plants,  
53 as previously shown for the animal, fungal, and archaeal lineages. In plants, the ABCE2  
54 protein seems important for general growth and vascular development, likely due to an  
55 indirect effect through auxin metabolism.

56

57 Keywords: Arabidopsis ABCE2, ribosome recycling, translation machinery, venation  
58 pattern, auxin homeostasis

59

## 60 INTRODUCTION

61 Messenger RNA (mRNA) molecules are decoded for protein synthesis by the complex and  
62 ancient translation machinery, formed by the ribosome and different sets of translation  
63 factors, which function at different translation phases. Translation initiation factors promote  
64 the formation of the 70S/80S initiation complex, and the recognition of the mRNA translation  
65 start site (Rodnina, 2018; Shirokikh & Preiss, 2018). Translation elongation factors  
66 participate in the binding of aminoacyl-tRNAs to the ribosome, the peptide bond formation,  
67 and the ulterior release of the deacylated tRNA (Dever *et al.*, 2018). Translation termination  
68 factors act when the ribosome reaches the translation stop codon and the newly  
69 synthesized peptide is released. In this latter phase, the ribosome is dissociated into its  
70 50S/60S and 30S/40S subunits, which are recycled for a new cycle of translation initiation  
71 (Hellen, 2018). The ATP-Binding Cassette E (ABCE) proteins are soluble ABC proteins that  
72 participate in ribosome recycling and translation initiation, as has been demonstrated for  
73 archaea, fungi, and animals, but whose roles in plants remain unexplored (Kashima *et al.*,  
74 2014; Young *et al.*, 2015; Nürenberg-Goloub *et al.*, 2020; Simonetti *et al.*, 2020). Human  
75 ABCE1 was first named RNASE L INHIBITOR (RLI) due to its ability to inhibit the activity of  
76 RNase L, an enzyme that is only present in mammals (Bisbal *et al.*, 1995).

77 ABCE proteins contain an iron-sulfur cluster binding domain (FeSD), two nucleotide  
78 binding domains (NBD1 and NBD2), and two hinge motifs (Karcher *et al.*, 2005; Barthelme  
79 *et al.*, 2007; Karcher *et al.*, 2008). The first hinge motif allows NBD movement to bind and  
80 hydrolyze ATP. The second hinge motif and a helix-loop-helix (HLH) mediate the interaction  
81 of the ABCE protein with the ribosome after occlusion of two ATP molecules. Once in the  
82 ribosome, the ABCE protein displaces its FeSD to split the ribosome, and remains bound  
83 to the 30S/40S subunit to prevent a premature recruitment of a 50S/60S subunit during  
84 translation initiation. Finally, ATP hydrolysis allows ABCE detachment from the 30S/40S  
85 subunit (Barthelme *et al.*, 2011; Becker *et al.*, 2012; Preis *et al.*, 2014; Heuer *et al.*, 2017;  
86 Nürenberg-Goloub *et al.*, 2018; Gouridis *et al.*, 2019; Kratzat *et al.*, 2021).

87 In most genomes, the ABCE subfamily is represented by a single-copy gene, usually  
88 named *ABCE1*, whose null alleles are lethal, while hypomorphic alleles result in  
89 developmental defects and slow-growth phenotypes (Navarro-Quiles *et al.*, 2018).  
90 *Arabidopsis thaliana* (hereafter referred to as *Arabidopsis*), however, has two *ABCE*  
91 paralogs named *ABCE1* and *ABCE2* (Sánchez-Fernández *et al.*, 2001; Verrier *et al.*, 2008).  
92 *Arabidopsis ABCE2* has been studied for its RNA silencing suppression activity (Sarmiento  
93 *et al.*, 2006; Möttus *et al.*, 2020). In *Cardamine hirsuta*, a close relative of *Arabidopsis* with  
94 compound leaves, only one *ABCE* gene has been identified, *SIMPLE LEAF3 (SIL3)*, which  
95 is required for leaflet formation and leaf development. The leaves of homozygotes for the  
96 hypomorphic *sil3* mutation are simple and have vascular defects, probably caused by an

97 aberrant auxin transport and homeostasis (Kougioumoutzi *et al.*, 2013).

98         Here, we report a functional analysis of the Arabidopsis *ABCE2* gene. We studied  
99 two recessive alleles of *ABCE2*: the hypomorphic and viable *apiculata7-1* (*api7-1*) allele,  
100 and the null and lethal *api7-2* allele. The *api7-1* mutant exhibits the typical morphological  
101 phenotype caused by mutations in genes encoding ribosome biogenesis factors and  
102 ribosomal proteins, which includes aberrant leaf venation patterns. We found by co-  
103 immunoprecipitation that *ABCE2* physically interacts with components of the translation  
104 machinery, and by RNA-seq that its partial loss of function triggers iron and sulfur deficiency  
105 responses that might be related to FeS cluster biogenesis, as well as the upregulation of  
106 auxin biosynthesis genes. Our observations strongly suggest a conserved role for *ABCE*  
107 proteins in ribosome recycling in plants, as previously shown for the animal, fungal, and  
108 archaeal lineages.

## 109 MATERIALS AND METHODS

### 110 Plant materials, growth conditions, and crosses

111 The *Arabidopsis thaliana* (L.) Heynh. wild-type accessions Landsberg *erecta* (Ler) and  
112 Columbia-0 (Col-0), and the *asymmetric leaves1-1* (*as1-1*; N3374; in the Col-1 genetic  
113 background) and *as2-1* (N3117; in ER) mutants were initially obtained from the Nottingham  
114 Arabidopsis Stock Center (NASC; Nottingham, United Kingdom). We introgressed the *as1-*  
115 *1* and *as2-1* mutations into the Col-0 background by crossing to Col-0 three times. The  
116 NASC also provided seeds of the *api7-2* (GABI\_509C06; N448798) (Kleinboelting *et al.*,  
117 2012) and *PIN1<sub>pro</sub>:PIN1:GFP DR5<sub>pro</sub>:3XVENUS:N7* (N67931) (Heisler *et al.*, 2005) lines.  
118 The *ATHB8<sub>pro</sub>:GUS* line (N296) was kindly provided by Simona Baima (Baima *et al.*, 1995).  
119 The *api7-1* line was isolated in the Ler background after ethyl methanesulfonate (EMS)  
120 mutagenesis in our laboratory, and then backcrossed twice to Ler (Berná *et al.*, 1999).  
121 Unless otherwise stated, all the mutants mentioned in this work are homozygous for the  
122 mutations indicated. Seed sterilization and sowing, plant culture, crosses, and allelism tests  
123 were performed as previously described (Ponce *et al.*, 1998; Berná *et al.*, 1999; Quesada  
124 *et al.*, 2000).

125

### 126 Positional cloning and molecular characterization of *ABCE2* mutant alleles

127 Genomic DNA was extracted as previously described (Ponce *et al.*, 2006). The *ABCE2*  
128 gene was cloned as previously described (Mateo-Bonmatí *et al.*, 2014). First, we mapped  
129 the *api7-1* mutation to a 123.5-kb candidate interval containing 30 genes using a mapping  
130 population of 273 F<sub>2</sub> plants derived from an *api7-1* × Col-0 cross, and the primers listed in  
131 Table S1, as previously described (Ponce *et al.*, 1999; Ponce *et al.*, 2006). Then, the whole  
132 *api7-1* genome was sequenced by Fasteris (Geneva, Switzerland) using the Illumina  
133 HiSeq2000 platform. The bioinformatic analysis of the data was performed as previously  
134 described (Mateo-Bonmatí *et al.*, 2014).

135 Discrimination between the wild-type *ABCE2* and *api7-1* mutant alleles was done  
136 by PCR with the *api7-1*\_F/R primers (Table S1), followed by restriction with *Eco57I* (Thermo  
137 Fisher Scientific), as the *api7-1* mutation (CTCCAG→CTICAG) creates an *Eco57I*  
138 restriction site. The presence and position of the *api7-2* T-DNA insertion in the  
139 GABI\_509C06 line was confirmed by PCR amplification and Sanger sequencing,  
140 respectively, using gene-specific primers and the o8409 primer for the GABI-Kat T-DNA  
141 (Table S1).

142

### 143 Gene constructs and plant transformation

144 All inserts were PCR amplified from Col-0 genomic DNA using Phusion High Fidelity DNA  
145 Polymerase (Thermo Fisher Scientific) and primers that contained *attB* sites at their 5' ends

146 (Table S1). PCR products were purified using an Illustra GFX PCR DNA and Gel Band  
147 Purification Kit (Cytiva), and then cloned into the pGEM-T Easy221 vector, transferred to  
148 *Escherichia coli* DH5 $\alpha$ , and subcloned into the pEarleyGate 101, pMDC83, or pMDC107  
149 destination vectors (Curtis & Grossniklaus, 2003; Earley *et al.*, 2006) as previously  
150 described (Mateo-Bonmatí *et al.*, 2018).

151 All constructs were transferred to electrocompetent *Agrobacterium tumefaciens*  
152 GV3101 (C58C1 Rif<sup>R</sup>) cells, which were used to transform *Ler* or *api7-1* plants by the floral  
153 dip method (Clough & Bent, 1998). Putative transgenic plants were selected on plates  
154 supplemented with 15  $\mu\text{g}\cdot\text{ml}^{-1}$  hygromycin B (Thermo Fisher Scientific, Invitrogen).

155 To obtain the GSRhino-TAP-tagged ABCE2 fusion, a pGEM-T Easy221 vector  
156 harboring the *ABCE2* coding sequence, together with the pEN-L4-2-R1 and pEN-R2-  
157 GSRhinotag-L3 entry vectors were subcloned into the pKCTAP destination vector as  
158 previously described (Van Leene *et al.*, 2015). Transformation of Arabidopsis cell cultures  
159 was performed as previously described (Van Leene *et al.*, 2015).

160

### 161 **Phenotypic analysis and morphometry**

162 Photographs were taken with a Nikon SMZ1500 stereomicroscope equipped with a Nikon  
163 DXM1200F digital camera. For larger specimens, four to five partial images from the same  
164 plant were taken and merged using the Photomerge tool of Adobe Photoshop CS3 software.  
165 For rosette size, rosette silhouettes were drawn on the screen of a Cintiq 18SX Interactive  
166 Pen Display (Wacom) using Adobe Photoshop CS3, and their sizes were measured with  
167 the NIS Elements AR 3.1 image analysis package (Nikon). Root length was measured per  
168 triplicate from photographs with the Freehand line tool from Fiji software  
169 (<https://imagej.net/ImageJ>) (Schindelin *et al.*, 2012). Shoot length was measured *in vivo*  
170 with a millimeter ruler, from the soil to the apex of the main shoot. Chlorophyll *a* and *b* and  
171 carotenoids were extracted and spectrophotometrically determined as previously described  
172 (Wellburn, 1994; Micol-Ponce *et al.*, 2020), and normalized to the amount of collected  
173 tissue.

174

### 175 **Differential interference contrast and bright-field microscopy, and GUS analyses**

176 For differential interference contrast (DIC) and bright-field microscopy, all samples were  
177 cleared, mounted, and photographed as previously described (Candela *et al.*, 1999).  
178 Micrographs of venation patterns, and leaf primordia expressing *ATHB8<sub>pro</sub>:GUS* were taken  
179 under bright field with a Nikon D-Eclipse C1 confocal microscope equipped with a Nikon  
180 DS-Ri1 camera, using the NIS-Elements AR 3.1 software (Nikon). Diagrams from leaf cells  
181 and venation patterns, and morphometric analysis of leaf cells were obtained as previously  
182 described (Pérez-Pérez *et al.*, 2011; Mateo-Bonmatí *et al.*, 2018). For venation pattern

183 morphometry, the phenoVein (<http://www.plant-image-analysis.org>) (Bühler *et al.*, 2015)  
184 software was used. Leaf lamina circularity was calculated as  $4 \cdot \pi \cdot area/perimeter^2$ .  
185 Lamina area and perimeter were measured on diagrams from the leaf lamina with the Fiji  
186 Wand tool. GUS assays were performed as previously described (Robles *et al.*, 2010).

187

### 188 **Confocal microscopy and fluorescence quantification**

189 Confocal laser scanning microscopy images were obtained using a Nikon D-Eclipse C1  
190 confocal microscope equipped with a Nikon DS-Ri1 camera and processed with the  
191 operator software EZ-C1 (Nikon). Visualization of the fluorescent proteins and dyes was  
192 performed on primary roots mounted with deionized water on glass slides. Fluorescent  
193 proteins, 4',6-diamidino-2-phenylindole (DAPI), and propidium iodide were visualized as  
194 described in Table S2. For fluorescence quantification of the *PIN1<sub>pro</sub>:PIN1:GFP* and  
195 *DR5<sub>pro</sub>:3XVENUS:N7* protein products, wild-type and *api7-1* seedlings homozygous for  
196 these transgenes were grown vertically on the same Petri dishes under identical conditions  
197 for 5 days. Image acquisition was performed using a 40x objective with a 0.75 numerical  
198 aperture. The dwell time was set at 2.16 and 1.68  $\mu$ s for PIN1:GFP and 3XVENUS:N7,  
199 respectively. Four images were acquired and averaged per optical section. Five optical  
200 sections encompassing 4  $\mu$ m from the innermost root layers were photographed. Acquired  
201 images (.ids files) were used to generate flat images (.tiff files) with Fiji, by stacking the  
202 optical sections from the fluorescent protein channel. Fluorescence quantification was  
203 performed using the Fiji Mean gray value measurement.

204

### 205 **RNA isolation, cDNA synthesis, and quantitative PCR**

206 Samples for RNA extraction were collected on ice and immediately frozen for storage at  
207  $-80^{\circ}\text{C}$  until use. RNA was isolated using TRIzol (Thermo Fisher Scientific, Invitrogen).  
208 Removal of contaminating DNA, cDNA synthesis, and quantitative PCR (qPCR) were  
209 performed as previously described (Mateo-Bonmatí *et al.*, 2018). The qPCR was performed  
210 as follows: 2 min at  $50^{\circ}\text{C}$ , 10 min at  $95^{\circ}\text{C}$ , followed by 41 cycles of 15 s at  $95^{\circ}\text{C}$  and 1 min  
211 at  $60^{\circ}\text{C}$ , and a final step of 15 s at  $95^{\circ}\text{C}$ , and *ACTIN2* (*ACT2*) was used as an internal  
212 control for relative expression analysis (Moschopoulos *et al.*, 2012). Three biological  
213 replicates, each with three technical replicates, were analyzed per genotype. Relative  
214 quantification of gene expression data was performed using the comparative  $C_T$  method  
215 ( $2^{-\Delta\Delta C_T}$ ) (Schmittgen & Livak, 2008).

216

### 217 **RNA-seq analysis**

218 Total RNA was isolated from 100 mg of *Ler* and *api7-1* rosettes collected 14 days after



219 stratification (das) using TRIzol. RNA concentration and quality were assessed using a 2100  
220 Bioanalyzer (Agilent Genomics) with an RNA 600 Nano Kit (Agilent Technologies) as  
221 previously described (Mateo-Bonmatí *et al.*, 2018). Three biological replicates per  
222 genotype, with more than 14 µg of total RNA per sample, and an RNA integrity number  
223 (RIN) higher than 7, were sent to Novogene (Cambridge, United Kingdom) for massive  
224 parallel sequencing. Sequencing libraries were generated using NEBNext Ultra RNA Library  
225 Prep Kit for Illumina (New England Biolabs) and fed into a NovaSeq 6000 Illumina platform  
226 with a S4 Flow Cell type, which produced paired-end reads of 150 bp (Table S3). Read  
227 mapping to the Arabidopsis genome (TAIR10) using the 2.0.5 version of HISAT2 (Kim *et*  
228 *al.*, 2019), with default parameters, and the identification of differentially expressed genes  
229 between *Ler* and *api7-1* with the 1.22.2 version of DESeq2 R package (Love *et al.*, 2014)  
230 were performed by Novogene. Genes with a *P*-value < 0.05 adjusted with the Benjamini  
231 and Hochberg's method, and with a fold change > 1.5 were considered differentially  
232 expressed. The gene ontology (GO) enrichment analysis of the differentially expressed  
233 genes was performed with the online tool DAVID (<https://david.ncifcrf.gov/home.jsp>) (Huang  
234 *et al.*, 2009a; Huang *et al.*, 2009b).

235

### 236 **Indol-3-acetic acid metabolite profiling**

237 Shoots, whole roots, and primary root tips (3 mm approximately) were collected 9 das from  
238 vertically grown seedlings. These samples were rapidly weighed and frozen in liquid  
239 nitrogen. Extraction and purification of the targeted compounds (anthranilate [Ant],  
240 tryptophan [Trp], indole-3-acetonitrile [IAN], indol-3-acetic acid [IAA], IAA-glucose [IAA-Glc],  
241 IAA-aspartate [IAA-Asp], IAA-glutamate [IAA-Glu], 2-oxindole-3-acetic acid [oxIAA], and  
242 oxIAA-glucoside [oxIAA-Glc]) were performed as previously described (Novák *et al.*, 2012;  
243 Mateo-Bonmatí *et al.*, 2021). Ultra-high performance liquid chromatography followed by  
244 tandem mass spectrometry (UHPLC-MS/MS) analysis was performed as previously  
245 described (Pěňčík *et al.*, 2018).

246

### 247 **Co-immunoprecipitation assay**

248 For protein extraction, 700 mg of whole *api7-1 35S<sub>pro</sub>:ABCE2:YFP* seedlings were collected  
249 10 das per biological replicate. The tissue was crosslinked with 1× phosphate-saline buffer  
250 containing 1% (v/v) formaldehyde as previously described (Poza-Viejo *et al.*, 2019). For  
251 protein extraction, the tissue was ground to a fine powder with liquid nitrogen and then  
252 resuspended in a lysis buffer (50 mM Tris-HCl, pH 7.5; 0.1% [v/v] IGEPAL CA-630 [Sigma-  
253 Aldrich]; 2 mM phenylmethylsulfonyl fluoride [PMSF; Sigma-Aldrich]; 150 mM NaCl; and a  
254 cOmplete protease inhibitor cocktail tablet [Sigma-Aldrich]) using a vortexer. After  
255 incubation on ice for 10 min, the samples were centrifuged at 4°C and the supernatants



256 were used as protein extracts. Co-immunoprecipitation was performed with the  $\mu$ MACS  
257 GFP Isolation Kit (Milteny Biotec) using protein extracts from three biological replicates. The  
258 immunoprecipitation of the ABCE2:YFP fusion protein was checked by western blotting  
259 using an anti-GFP-HRP antibody (Milteny Biotec), and the WesternSure chemiluminiscent  
260 substrate on a C-DiGit Blot Scanner (LI-COR).

261 The co-immunoprecipitates were analyzed by liquid chromatography followed by  
262 electrospray ionization and MS/MS (LC-ESI-MS/MS) at the Centro Nacional de  
263 Biotecnología (CNB) Proteomics facility (Madrid, Spain). Tandem mass spectra were  
264 searched against Araport11 using the MASCOT search engine (Matrix Science,  
265 <http://www.matrixscience.com/>). Peptide sequences identified with a false discovery rate  
266 (FDR) < 1% were considered statistically valid. Proteins identified with at least 2 peptides  
267 without overlapping sequences (unique peptides) in at least 2 biological replicates (namely,  
268 at least 4 peptides) were considered identified with high confidence. To search for potential  
269 ABCE2:YFP interactors, proteins whose subcellular localization was not predicted to be  
270 cytoplasmic by SUBA4 (<https://suba.live/>) (Hooper *et al.*, 2014; Hooper *et al.*, 2017) were  
271 discarded, with the exception of At2g20830, which is predicted to localize to mitochondria  
272 (see Results). To further discard potential false positive interactions, all the proteins  
273 identified in three other co-immunoprecipitations of GFP-fused proteins performed in our  
274 laboratory under identical conditions to that of ABCE2:YFP, but functionally unrelated, were  
275 used to create a subtract list. Proteins identified in ABCE2:YFP samples with at least twice  
276 the number of peptides assigned to the same protein in the subtract list were considered  
277 enriched. The rest of the proteins, which contained a more similar number of peptides  
278 between the ABCE2:YFP list and the subtract list, were considered false positives and  
279 discarded. In addition, there were few proteins that were solely identified in ABCE2:YFP  
280 samples.

281

### 282 **Tandem affinity purification assay**

283 Tandem affinity purification (TAP) of the GSRhino-TAP-tagged ABCE2 fusion from  
284 Arabidopsis cell suspension cultures was performed as previously described (Van Leene *et al.*  
285 *et al.*, 2015; García-León *et al.*, 2018). Proteins were identified by nano LC-MS/MS at the  
286 CNB. Tandem mass spectra were searched against Araport11 using the MASCOT search  
287 engine. Proteins identified with at least 1 unique peptide with a MASCOT score higher than  
288 25 ( $p < 0.05$ ) were considered to be valid. Proteins identified with at least 1 unique peptide  
289 in the 2 biological replicates or 2 unique peptides in 1 biological replicate were considered  
290 identified with high confidence. We discarded as putative ABCE2 interactors those proteins  
291 that were not predicted to be cytoplasmic by SUBA4.

292 **Bioinformatic analyses**

293 The identity and similarity values between conserved proteins were obtained from global  
294 pairwise sequence alignments performed with EMBOSS Needle  
295 ([https://www.ebi.ac.uk/Tools/psa/emboss\\_needle/](https://www.ebi.ac.uk/Tools/psa/emboss_needle/)) (Madeira *et al.*, 2019). The multiple  
296 sequence alignment of ABCE orthologs was obtained with Clustal Omega  
297 (<https://www.ebi.ac.uk/Tools/msa/clustalo/>) (Madeira *et al.*, 2019).

298 A TBLASTN search was performed to identify *ABCE* genes within eudicots  
299 (taxid:71240) against the sequences contained in the Nucleotide collection database at the  
300 National Center for Biotechnology Information BLASTP server (NCBI;  
301 <https://blast.ncbi.nlm.nih.gov/Blast.cgi>) (Altschul *et al.*, 1997) using *Arabidopsis thaliana*  
302 ABCE2 protein as the query (NP\_193656). The phylogenetic analysis was performed using  
303 the NCBI accession numbers listed in Table S4 with MEGA X software (Kumar *et al.*, 2018):  
304 the multiple sequence alignment and the phylogenetic tree were obtained using codon  
305 recognition with Muscle (Edgar, 2004b; Edgar, 2004a), and the Neighbor-Joining method  
306 (Saitou & Nei, 1987), respectively.

307

308 **Accession numbers**

309 Sequence data can be found at The Arabidopsis Information Resource  
310 (<https://www.arabidopsis.org/>) under the following accession numbers: *ABCE1*  
311 (At3g13640), *ABCE2* (At4g19210), *ACT2* (At3g18780), *ATHB8* (At4g32880), *OTC*  
312 (At1g75330), and *PIN1* (At1g73590).

## 313 RESULTS

### 314 The *apiculata7-1* mutant exhibits a pleiotropic morphological phenotype

315 The *apiculata7-1* (*api7-1*) mutant, which we initially named *api7*, was isolated in a previous  
316 large-scale screen for EMS-induced mutations affecting leaf development (Berná *et al.*,  
317 1999). Its pleiotropic morphological phenotype includes a small rosette, a short primary root,  
318 and a delay in main stem growth (Fig. 1; Fig. S1a). The *api7-1* inflorescences and siliques  
319 are seemingly normal (Fig. S1b–g). The rosette leaves are pointed, indented, and pale, and  
320 contain a reduced amount of photosynthetic pigments, compared to its wild-type *Ler* (Fig.  
321 1; Fig. S1h). *api7-1* first-node leaves show a marked reduction in cell size in the abaxial and  
322 adaxial epidermal layers, but not in the palisade mesophyll (Fig. S2).

323 The pleiotropic phenotype of *api7-1* plants is reminiscent of mutants carrying loss-  
324 of-function alleles of genes encoding ribosomal proteins or ribosome biogenesis factors  
325 (Byrne, 2009; Horiguchi *et al.*, 2011; Rosado *et al.*, 2012; Weis *et al.*, 2015; Micol-Ponce *et*  
326 *al.*, 2018). As these mutations usually alter leaf vascular development, we cleared *api7-1*  
327 and *Ler* leaves with chloral hydrate, and observed their venation patterns. We confirmed  
328 that *api7-1* fully expanded first-node and, to a lesser extent, third-node rosette leaves,  
329 contain fewer higher-order veins, and more prominent indentations and vascularized  
330 hydathodes, particularly in the leaf apex, than *Ler* leaves (Fig. 2; Fig. S3). In contrast, these  
331 phenotypic traits seemed to be unaffected on *api7-1* cotyledons, cauline leaves, sepals,  
332 and petals (Fig. S4; Table S5). The *ARABIDOPSIS THALIANA HOMEBOX GENE 8*  
333 (*ATHB8*) gene is expressed in pre-procambial cells that will differentiate into veins (Baima  
334 *et al.*, 1995). To determine the stage at which *api7-1* leaf venation pattern formation  
335 diverged from that of *Ler*, we crossed *api7-1* plants to an *ATHB8<sub>pro</sub>:GUS* line, and studied  
336 the expression of the transgene in cleared first-node rosette leaf primordia of *api7-1*  
337 *ATHB8<sub>pro</sub>:GUS* plants. Consistent with the slow growth phenotype of *api7-1* plants, we  
338 observed a delay in the emergence of first-node leaves (Fig. S5). In addition, *api7-1*  
339 primordia retained high GUS activity at their apical region even after the formation of the  
340 whole midvein (Fig. S5m,n), suggesting that an increased vascular differentiation in that  
341 region is responsible of the vascular phenotype of mature *api7-1* leaves (Fig. S3).

342 *ASYMMETRIC LEAVES 1* (*AS1*) and *AS2* encode transcription factors involved in  
343 leaf dorsoventral patterning. Double mutant combinations of *as1* or *as2* with mutations in  
344 genes encoding ribosomal proteins or other components of the translation machinery  
345 usually produce synergistic phenotypes. These phenotypes are easily distinguished by the  
346 presence of trumpet-shaped (peltate) or radial leaves originated by partial or complete loss  
347 of dorsoventrality, respectively (Pinon *et al.*, 2008; Yao *et al.*, 2008; Horiguchi *et al.*, 2011;  
348 Moschopoulos *et al.*, 2012; Casanova-Sáez *et al.*, 2014; Mateo-Bonmatí *et al.*, 2015). We  
349 obtained *api7-1 as1-1* and *api7-1 as2-1* double mutants in the *Col-0* background; these

350 double mutants exhibited additive and synergistic phenotypes, respectively (Fig. S6). The  
351 presence of radial leaves in *api7-1 as2-1* plants further supports a role for API7 in translation  
352 (Fig. S6f,g).

353

### 354 ***api7-1* is a viable mutant allele of the *ABCE2* gene**

355 The *api7-1* mutation was previously mapped to chromosome 4 (Robles & Micol, 2001). To  
356 identify the mutated gene, we combined map-based cloning and next-generation  
357 sequencing, as previously described (Mateo-Bonmatí *et al.*, 2014). First, we performed  
358 linkage analysis of an F<sub>2</sub> mapping population, which allowed us to delimit a candidate  
359 interval encompassing 30 annotated genes (Fig. 3a). We then sequenced the whole *api7-*  
360 *1* genome and identified 4 EMS-type nucleotide substitutions within the candidate interval  
361 (Table S6). Only one of these, a C→T transition in At4g19210, was predicted to be a  
362 missense mutation causing a Pro138→Ser substitution (Fig. 3b). The At4g19210 gene  
363 encodes ABCE2, a protein of 605 amino acids (68.39 kDa). The Pro138 residue, at the  
364 beginning of the HLH motif located within NBD1, is conserved across all eukaryotic ABCE  
365 proteins tested, except in *Caenorhabditis elegans* (Fig. S7), in which it seems to have  
366 evolved more divergently (Chen *et al.*, 2006). The conservation of this residue suggests that  
367 it is necessary for the proper function of ABCE proteins, probably for the interactions with  
368 the ribosome, which mainly occur through the HLH and hinge motifs (Heuer *et al.*, 2017;  
369 Nürenberg-Goloub *et al.*, 2020; Kratzat *et al.*, 2021).

370 To confirm that the mutation found in At4g19210 causes the phenotype of the *api7-*  
371 *1* mutant, we obtained the *ABCE2<sub>pro</sub>:ABCE2* transgene, which was transferred into *api7-1*  
372 plants. This transgene completely restored the wild-type rosette leaf shape and stem height  
373 (Fig. 1c–e), as well as the photosynthetic pigment content (Fig. S1h). The *ABCE2<sub>pro</sub>:ABCE2*  
374 transgene partially restored the root length, and leaf epidermal cell sizes (Fig. S1a, S2). To  
375 provide further confirmation that *api7-1* is an allele of *ABCE2*, we performed an allelism test  
376 using GABI\_509C06 plants (Kleinboelting *et al.*, 2012), which were heterozygous for a T-  
377 DNA insertion in the 10<sup>th</sup> exon of At4g19210 (Fig. 3b). We named *api7-2* the insertional  
378 allele in GABI\_509C06. In the F<sub>2</sub> population of this cross, no *api7-2/api7-2* plants were  
379 found, and *api7-1/api7-2* and *api7-1/api7-1* plants were phenotypically similar, confirming  
380 that these mutations are allelic and that loss of function of *ABCE2* is responsible for the  
381 phenotype of the *api7-1* mutant (Fig. S8a–c).

382 The absence of *api7-2/api7-2* plants derived from GABI\_509C06 seeds, and of  
383 ungerminated seeds in the F<sub>1</sub> progeny of selfed heterozygous *ABCE2/api7-2* plants,  
384 suggested an early lethality of this mutant allele. We dissected immature siliques from  
385 *ABCE2/api7-2* plants and found 21.95% aborted seeds ( $n = 328$ ), which fits a 1:3 Mendelian  
386 segregation ratio ( $\chi^2 = 1.63$ ;  $P$ -value = 0.202; degrees of freedom = 1). Col-0 siliques showed

387 1.37% aborted ovules ( $n = 148$ ; Fig. S8d,e). The lethality caused by *api7-2* suggests that it  
388 is a null allele of *ABCE2*, while *api7-1* is hypomorphic.

389

### 390 **The Arabidopsis genome contains two partially redundant *ABCE* paralogs**

391 To gather information about the origin of the two Arabidopsis *ABCE* paralogs, we performed  
392 a phylogenetic analysis of *ABCE* coding sequences from some Rosidae species (rosids;  
393 Fig. S9). Among them, we found that other Brassicaceae genomes also encode *ABCE1*  
394 and *ABCE2* proteins, but only *ABCE2* was identified in *Cardamine hirsuta*. Consistent with  
395 the whole-genome triplication in *Brassica rapa* (Zhang *et al.*, 2018), we found two and three  
396 *Brassica rapa* *ABCE1* and *ABCE2* sequences, respectively. All Brassicaceae *ABCE1* genes  
397 grouped together in the phylogenetic tree, and separately from their *ABCE2* paralogs, which  
398 formed other subclade. Although both *ABCE1* and *ABCE2* paralogs have been conserved,  
399 *ABCE1* orthologs have evolved more rapidly than their *ABCE2* paralogs, whose short  
400 evolutionary distances indicate that they are under strong evolutionary pressure, as  
401 expected for an essential gene.

402 As previously described (Braz *et al.*, 2004; Sarmiento *et al.*, 2006), we observed that  
403 *ABCE2* is highly expressed throughout all Arabidopsis developmental stages. By contrast,  
404 the expression levels of its *ABCE1* paralog are very low in all studied organs, in which first-  
405 node leaves and flowers show the lowest and highest expression levels, respectively (Fig.  
406 S10a,b). The expression level of *ABCE1* in *api7-1* rosettes was the same as in *Ler*, showing  
407 that *ABCE1* cannot compensate for the partial loss of *ABCE2* function in rosettes (Fig.  
408 S10c). However, *api7-1* flowers, where we observed the highest *ABCE1* expression levels,  
409 do not show apparent aberrations (Fig. S1c), suggesting that *ABCE1* and *ABCE2* might  
410 play similar roles during flower development.

411 *ABCE1* and *ABCE2* proteins share 80.8% identity, suggesting that *ABCE1* and  
412 *ABCE2* might be functionally equivalent. To test this hypothesis, we performed a promoter  
413 swapping assay between the *ABCE1* and *ABCE2* genes (Fig. 4). As expected from the  
414 lower expression levels driven by the *ABCE1* promoter, *api7-1* *ABCE1<sub>pro</sub>:ABCE2* plants  
415 were indistinguishable from *api7-1* mutants, highlighting that correct protein levels are as  
416 important as the correct sequence for normal *ABCE2* function. In contrast, the  
417 *ABCE2<sub>pro</sub>:ABCE1* transgene partially rescued the *api7-1* phenotype, showing that the  
418 *ABCE1* and *ABCE2* proteins are functionally redundant. Further supporting equivalent  
419 functions for *ABCE1* and *ABCE2*, the constitutive expression of *ABCE1* with a  
420 *35S<sub>pro</sub>:ABCE1* transgene fully restored a wild-type phenotype in *api7-1* rosettes (Fig. S11).

421

422

423



424 **ABCE2 is a cytoplasmic protein that physically associates with components of the**  
425 **translation machinery**

426 To determine the subcellular localization of Arabidopsis ABCE2, we obtained in-frame  
427 translational fusions of ABCE2 to GFP and YFP, driven by the 35S promoter:  
428 *35S<sub>pro</sub>:ABCE2:GFP* and *35S<sub>pro</sub>:ABCE2:YFP*. We visualized the ABCE2:GFP fusion protein  
429 in the cytoplasm of root cells treated with propidium iodide, which mainly stains cell walls,  
430 and the ABCE2:YFP fusion protein in roots stained with the nucleoplasm dye DAPI, and  
431 confirmed the nuclear exclusion of ABCE2 (Fig. 5).

432 To investigate the function of ABCE2, we performed a co-immunoprecipitation assay  
433 using the ABCE2:YFP protein from a homozygous T<sub>3</sub> *api7-1 35S<sub>pro</sub>:ABCE2:YFP* line, which  
434 was phenotypically wild-type, confirming that the fusion protein is functional (Fig. S12a–c).  
435 We checked the purification of the fusion protein by western blotting using an anti-GFP  
436 antibody (Fig. S12d–f). Using LC-ESI-MS/MS, we identified 20 putative interactors of  
437 ABCE2, of which 13 participate in translation (6 subunits of the eIF3 complex, eIF5B,  
438 RPL3B, and ROTAMASE CYP 1 [ROC1]) or in its regulation (At5g58410,  
439 EVOLUTIONARILY CONSERVED C-TERMINAL REGION 2 [ECT2], ILITYHIA [ILA], and  
440 REGULATORY-ASSOCIATED PROTEIN OF TOR 1 [RAPTOR1] or RAPTOR2), and two  
441 others had previously been shown to interact with ABCE2 orthologs (At2g20830, and  
442 EXPORTIN 1A [XPO1A] or XPO1B). The functions of the remaining 5 proteins that co-  
443 immunoprecipitated with ABCE2 are unclear and these proteins were therefore set aside  
444 for future characterization (Fig. 6; Fig. S13; Tables S7, S8; Data Set 1).

445 At2g20830 encodes a folic acid binding/transferase that shares 30.2% and 26.7%  
446 identity with human and *Saccharomyces cerevisiae* Lto1 (named after “required for  
447 biogenesis of the large ribosomal subunit and initiation of translation in oxygen”),  
448 respectively (human and *S. cerevisiae* Lto1 proteins share 27.8% identity). Lto1, together  
449 with Yae1, constitute an essential complex for FeS cluster assembly on ABCE1 (Zhai *et al.*,  
450 2014; Paul *et al.*, 2015; Zhu *et al.*, 2020; Prusty *et al.*, 2021). Despite the observation that  
451 At2g20830 protein was predicted to localize to mitochondria, the conservation level of this  
452 protein with its yeast and human Lto1 orthologs prompted us to consider At2g20830 an  
453 ABCE2 interactor. Indeed, At2g20830 may be necessary for FeS cluster assembly on  
454 ABCE2.

455 Our co-immunoprecipitation assay suggested that Arabidopsis ABCE2 interacts with  
456 6 of the 13 eIF3 subunits: eIF3a, c, d, e, k, and j. In *S. cerevisiae*, those interactions have  
457 been related to the presence of the ABCE1 protein in the 40S subunit after ribosome  
458 dissociation, until late steps of initiation of a new cycle of translation (Heuer *et al.*, 2017;  
459 Mancera-Martínez *et al.*, 2017; Kratzat *et al.*, 2021). Interestingly, the interaction between  
460 the non-stoichiometric subunit eIF3j and ABCE1 also occurs in humans and *S. cerevisiae*.



461 In these species, eIF3j acts as an accessory factor for ABCE1-mediated ribosome  
462 dissociation (Young & Guydosh, 2019; Kratzat *et al.*, 2021), a function that seems to be  
463 conserved in Arabidopsis.

464 To corroborate and extend the list of interactions between ABCE2 and components  
465 of the translation machinery, we performed a TAP assay of a GSRhino-TAP-tagged ABCE2  
466 bait, obtained from cell suspension cultures, and identified its putative interactors by nano  
467 LC-MS/MS (Data Set 2). We found that 81 proteins co-purified with ABCE2, of which 28  
468 were ribosomal proteins (Data Set 2e).

469

#### 470 ***api7-1* mutation perturbs auxin metabolism**

471 To gain insight into the biological processes affected in the *api7-1* mutant, we performed an  
472 RNA-seq analysis of *Ler* and *api7-1* shoots collected 14 das. We identified 3218  
473 downregulated and 2135 upregulated genes in the *api7-1* mutant (Data Set 3a). A GO  
474 enrichment analysis performed separately for down- and upregulated genes showed that  
475 the downregulated genes were mainly related to responses to abiotic and biotic stresses  
476 and protein post-translational modifications. In contrast, upregulated genes grouped into  
477 more diverse Biological Process terms (Data Set 3b,c). Among them, we found three terms  
478 related to auxin (response to auxin [GO:0009733], auxin-activated signaling pathway  
479 [GO:0009734], and auxin polar transport [GO:0009926]).

480 We observed that four out of the six genes that participate in the main auxin  
481 biosynthesis pathway in shoots were upregulated. They included two of the three genes  
482 encoding enzymes that convert tryptophan (Trp) into indole-3-pyruvic acid (IPyA),  
483 *TRYPTOPHAN AMINOTRANSFERASE OF ARABIDOPSIS 1* (*TAA1*), and *TAA1-*  
484 *RELATED 2* (*TAR2*), and two *YUCCA* genes (*YUC2* and *YUC6*) encoding enzymes that  
485 turn IPyA into indole-3-acetic acid (IAA) (Cheng *et al.*, 2007; Casanova-Sáez *et al.*, 2021;  
486 Kneuper *et al.*, 2021). However, the expression of two genes involved in a secondary  
487 pathway for IAA biosynthesis, *CYTOCHROME P450, FAMILY 79, SUBFAMILY B,*  
488 *POLYPEPTIDE 2* (*CYP79B2*) and *IAMHYDROLASE12* (*IAMH2*) were downregulated. We  
489 also found that four genes involved in auxin inactivation, *IAA*  
490 *CARBOXYLMETHYLTRANSFERASE 1* (*IAMT1*), *GRETCHEN HAGEN 3.17* (*GH3.17*),  
491 *DIOXYGENASE FOR AUXIN OXIDATION 2* (*DAO2*), and *UDP-glycosyltransferase 76E5*  
492 (*UGT76E5*) were upregulated, and that three genes involved in auxin reactivation, *IAA-*  
493 *LEUCINE RESISTANT (ILR)-LIKE 2* (*ILL2*), *ILL3*, and *ILL4* (Casanova-Sáez *et al.*, 2021;  
494 Mateo-Bonmatí *et al.*, 2021), were downregulated, probably in response to high auxin levels  
495 (Fig. 7a). In this manner, our transcriptional data point to an increase in auxin biosynthesis  
496 in *api7-1* shoots, which might be partially or fully compensated by reducing the synthesis  
497 rate in secondary pathways, and by inactivating and preventing the reactivation of IAA.

498 To directly assess our hypothesis, we checked the content of IAA, the main auxin in  
499 most plants, as well as some of its precursors and inactive forms in *api7-1* and *Ler* shoots,  
500 whole roots and root tips. We found a similar trend within the three tissues: an increase in  
501 IAA catabolism, as suggested by the RNA-seq results, and an accumulation of its  
502 precursors, when compared to *Ler* tissues (Fig. 7b–d; Fig. S14). The inactivation of IAA in  
503 *api7-1* shoots and whole roots mainly occurs through glutamate (IAA-Glu) and aspartate  
504 (IAA-Asp) conjugation, while in root tips occurs through IAA oxidation (oxIAA), and  
505 subsequent glycosylation (oxIAA-glc). *api7-1* shoots accumulate anthranilate (Ant), a  
506 substrate for Trp biosynthesis, and Trp itself, the main precursor for IAA biosynthesis. Whole  
507 roots and root tips accumulate indole-3-acetonitrile (IAN), another IAA precursor, and store  
508 the inactive glycosylated IAA (IAA-glc). The IAA levels were normal in shoots and root tips,  
509 suggesting that auxin homeostasis is maintained in *api7-1*. However, the IAA levels in whole  
510 roots were decreased by almost 50%, maybe due to its high inactivation levels. Trp levels  
511 were low in root tips, suggesting that it might be converted to IAN, which is  
512 overaccumulated, or to IAA, which seems to be stored and catabolized to maintain its  
513 normal levels.

514 In agreement with the reduced levels of IAA in *api7-1* whole roots, the levels of a  
515 fusion protein between the auxin exporter PIN-FORMED1 (PIN1) and GFP (PIN1:GFP) in  
516 *api7-1 PIN1<sub>pro</sub>:PIN1:GFP* roots were lower than in *Ler* roots (Fig. 7e,f). In addition, we  
517 observed that the expression of the synthetic auxin-responsive promoter *DR5* in *api7-1*  
518 *DR5<sub>pro</sub>:3XVENUS:N7* root tips, measured as the fluorescence intensity of 3XVENUS:N7,  
519 was slightly increased in comparison to *Ler DR5<sub>pro</sub>:3XVENUS:N7* root tips, indicating that  
520 auxin signaling might be also altered in *api7-1* (Fig. 7g,h).

521

### 522 **Genes related to iron homeostasis are deregulated in *api7-1* plants**

523 Interestingly, we also found in our RNA-seq assay that iron ion homeostasis and transport  
524 (GO:0055072 and GO:0006826), and response to iron and sulfur ion starvation  
525 (GO:0010106 and GO:0010438) terms were among the most enriched in the analysis of  
526 upregulated genes (Data Set 3b). For instance, genes related to iron uptake, such as *IRON-*  
527 *REGULATED TRANSPORTER 1 (IRT1)* and *FERRIC CHELATE REDUCTASE*  
528 *DEFECTIVE 1 (FRD1)* (Eide *et al.*, 1996; Robinson *et al.*, 1999), or to iron mobility, such as  
529 *NATURAL RESISTANCE-ASSOCIATED MACROPHAGE PROTEIN 3 (NRAMP3)* and  
530 *NRAMP6* (Lanquar *et al.*, 2005; Li *et al.*, 2019), and several genes encoding transcription  
531 factors induced by iron and sulfur deficiencies were upregulated in the *api7-1* mutant (Fig.  
532 S15). These pathways might be activated in *api7-1* plants to provide iron and sulfur for FeS  
533 cluster biogenesis, probably to compensate for the depletion in ABCE2 protein. Indeed, the  
534 gene that encodes the Arabidopsis NEET protein (termed after its conserved Asn-Glu-Glu-

535 Thr sequence near its C-terminus) (Colca *et al.*, 2004), which participates in FeS cluster  
536 transference during its biogenesis (Nechushtai *et al.*, 2012; Zandalinas *et al.*, 2020), was  
537 also upregulated (Fig. S15).

538 Consequently, the iron content in *api7-1* cells might be higher than in the wild type,  
539 and might be inducing the formation of reactive oxygen species (ROS), as occurs in mutants  
540 affected in free iron storage (Briat *et al.*, 2010). In agreement with this assumption, several  
541 terms related to oxidative stress responses were also enriched. Specifically, we found that  
542 *FERRITIN 2 (FER2)* and *FER3*, which encode iron storage proteins in response to high iron  
543 levels to avoid oxidative damage (Briat *et al.*, 2010; Reyt *et al.*, 2015), were upregulated  
544 (Fig. S15). In addition, previous studies have shown that ROS prevent FeS cluster assembly  
545 into ABCE proteins, which is necessary for their activity in ribosome recycling (Alhebshi *et*  
546 *al.*, 2012; Sudmant *et al.*, 2018; Zhu *et al.*, 2020). In this manner, *api7-1* plants might  
547 experience a positive feedback loop where a response to iron starvation due to reduced  
548 activity of ABCE2 increases iron levels, inducing the production of ROS which, in turn,  
549 further disturbs ABCE2 activity. Nevertheless, further studies are needed to ascertain a  
550 potential relation among ABCE2 activity, iron homeostasis, and oxidative stress, which were  
551 beyond the scope of this work.

## 552 DISCUSSION

### 553 Plant ABCE proteins participate in translation in a cross-kingdom conserved manner

554 In this work, we studied Arabidopsis ABCE2, one of the most conserved proteins among  
555 archaea and eukaryotes (Hopfner, 2012). Archaea, fungi, and animal ABCE proteins  
556 dissociate cytoplasmic ribosomes into their 30S/40S and 50S/60S subunits at different  
557 translation-related events (Nürnberg-Goloub & Tampé, 2019). After ribosome dissociation,  
558 an ABCE escorts the 30S/40S subunit until the late steps of translation initiation, preventing  
559 premature joining of the 50S/60S subunit into the preinitiation complex (Heuer *et al.*, 2017;  
560 Nürnberg-Goloub *et al.*, 2020).

561 The crosslinking performed on the tissue used for the ABCE2 co-  
562 immunoprecipitation assay did not allow us to discern direct from indirect ABCE2  
563 interactors. However, the interactions with XPO1A/B, eIF3j, and the protein encoded by  
564 At2g20830 are very likely to be direct, in agreement with previous studies in non-plant  
565 species (Kirli *et al.*, 2015; Paul *et al.*, 2015; Young & Guydosh, 2019; Kratzat *et al.*, 2021).  
566 In contrast, the interactions observed with other eIF3 subunits, RPL3B, ROC1, ECT2, ILA,  
567 RAPTOR1/2, and the protein encoded by At5g58410, which is annotated as E3 ubiquitin-  
568 protein ligase listerin (LTN1; UniProt code: Q9FG11) might occur indirectly as they are part  
569 of or interact with the translation machinery (Coaker *et al.*, 2006; Shao *et al.*, 2013; Kashima  
570 *et al.*, 2014; Sesma *et al.*, 2017; Wang *et al.*, 2017; Arribas-Hernández *et al.*, 2018; Faus *et al.*  
571 *et al.*, 2018; Izquierdo *et al.*, 2018; Scutenaire *et al.*, 2018; Wei *et al.*, 2018). However, the  
572 interaction between ABCE2 and eIF5B, which does not seem to occur in *S. cerevisiae* and  
573 mammals (Heuer *et al.*, 2017; Mancera-Martínez *et al.*, 2017), will require further  
574 exploration.

575 Further supporting a role for ABCE2 in translation, we observed a synergistic  
576 interaction in the *api7-1 as2-1* double mutant, which show radial leaves, as previously  
577 described for double mutant combinations of loss-of-function alleles of *AS1* or *AS2* and  
578 other components of the translation machinery (Pinon *et al.*, 2008; Yao *et al.*, 2008;  
579 Horiguchi *et al.*, 2011; Moschopoulos *et al.*, 2012; Casanova-Sáez *et al.*, 2014; Mateo-  
580 Bonmatí *et al.*, 2015). In this manner, our results strongly suggest that Arabidopsis and, by  
581 extension, all plant ABCEs, probably dissociate cytoplasmic ribosomes, as has been  
582 reported for species of other kingdoms (Nürnberg-Goloub & Tampé, 2019). In addition,  
583 previous works also support a conserved role for the Arabidopsis ABCE2 and human  
584 ABCE1 proteins as suppressors of RNA silencing (Braz *et al.*, 2004; Sarmiento *et al.*, 2006;  
585 Kärblane *et al.*, 2015; Möttus *et al.*, 2020). However, we did not find any ABCE2 interactor  
586 potentially involved in this process, nor any enriched ontology term related to gene silencing  
587 in our RNA-seq assay. This might be due to the need for a cellular environment that triggers  
588 RNA silencing and exposes this novel function of ABCE proteins. Further research will help

589 to assess a potential relationship between ribosome recycling and RNA silencing.

590

### 591 **The developmental defects of the *api7-1* mutant have different causes**

592 The essential function of ABCEs has been confirmed in several species: null alleles of  
593 *ABCE* genes in all studied organisms are lethal, while hypomorphic alleles cause severe  
594 growth aberrations (Navarro-Quiles *et al.*, 2018). In this work, we describe the first  
595 hypomorphic and null alleles of the *Arabidopsis ABCE2* gene, *api7-1* and *api7-2*,  
596 respectively. We showed that the *api7-2* mutation is lethal and that *api7-1* plants share  
597 developmental defects with other mutants affected in genes encoding ribosomal proteins or  
598 ribosome biogenesis factors. These phenotypic traits include an aberrant leaf venation  
599 pattern (Horiguchi *et al.*, 2011), as is the case for the *api7-1* mutant. Indeed, a mutant allele  
600 of *SIMPLE LEAF3*, the *Cardamine hirsuta ABCE* ortholog, also causes venation pattern  
601 defects which may be related to an aberrant auxin transport and signaling (Kougioumoutzi  
602 *et al.*, 2013).

603 In agreement with the involvement of local auxin biosynthesis, polar transport and  
604 signalling in vascular development (Verna *et al.*, 2019; Kneuper *et al.*, 2021), we observed  
605 that auxin metabolism and auxin-induced genes were upregulated in the *api7-1* mutant. In  
606 addition, a previous study found that the IAA content in *api7-1* seedlings was slightly  
607 reduced when compared to *Ler* (Pěňčík *et al.*, 2018). In our experimental conditions, IAA  
608 levels in *api7-1* shoots and root tips were normal, but reduced in whole roots. However, the  
609 general accumulation of IAA precursors and catabolites in *api7-1* seedlings suggests that,  
610 despite auxin metabolism in *api7-1* is perturbed, auxin homeostasis is maintained through  
611 different compensation mechanisms, like occurs in other mutants affected in IAA  
612 metabolism (Mellor *et al.*, 2016; Porco *et al.*, 2016; Zhang *et al.*, 2016). In this sense, the  
613 altered levels of IAA precursors and catabolites, and the deregulation of auxin signalling  
614 might contribute to the aberrant phenotype of *api7-1* plants. Our transcriptomic results also  
615 point to the deregulation of additional biological pathways as potential contributors to the  
616 *api7-1* phenotype: one of them might be an increased production of ROS, caused by a  
617 potential deregulation of iron and sulfur homeostasis.

618

### 619 **The *Arabidopsis ABCE1* and *ABCE2* proteins are functionally redundant**

620 *Arabidopsis* has two *ABCE* paralogs, *ABCE1* and *ABCE2* (Sánchez-Fernández *et al.*, 2001;  
621 Verrier *et al.*, 2008). In agreement with previous literature (Braz *et al.*, 2004; Sarmiento *et al.*,  
622 2006), we observed that *ABCE1* expression levels are low in all studied organs and  
623 throughout development, in contrast to the high expression of *ABCE2*. We also showed that  
624 *ABCE1* is unable to complement *ABCE2* dysfunction in *api7-1* rosettes *per se*.

625 However, the wild-type phenotype of *api7-1* flowers, where we found the highest

626 expression levels of *ABCE1*, and the ability of *ABCE2<sub>pro</sub>:ABCE1* and *35S<sub>pro</sub>:ABCE1* to  
627 complement the *api7-1* mutant phenotype, indicate that the ABCE1 protein is functional and  
628 that it may contribute to translation in the reproductive tissues of wild-type plants. In addition,  
629 our phylogenetic analysis showed that the *ABCE* duplication event occurred early during  
630 the evolution of Brassicaceae, and that at least five species from this clade conserved an  
631 *ABCE1* gene that evolved more rapidly than its *ABCE2* paralog, suggesting that *ABCE2*  
632 conserved the ancestral function, whereas *ABCE1* underwent hypofunctionalization (Veitia,  
633 2017).

634 ABCE proteins are encoded by a single gene in most species, and they are essential  
635 for archaea and eukaryotes (Navarro-Quiles *et al.*, 2018). Due to their importance, the  
636 molecular mechanisms by which they participate in ribosome recycling have been deeply  
637 studied, and remain a subject of intense research (Heuer *et al.*, 2017; Mancera-Martínez *et*  
638 *al.*, 2017; Nürenberg-Goloub *et al.*, 2018; Nürenberg-Goloub *et al.*, 2020; Kratzat *et al.*,  
639 2021). Nevertheless, the biological consequences of ABCE depletion or disruption are  
640 poorly understood in all organisms. In this sense, future research linking the molecular  
641 function of ABCEs with the phenotypic output of their dysfunction will contribute to  
642 determining the pathways through which translation modulates development, as we show  
643 here with the isolation and study of the hypomorphic and viable *api7-1* allele of the  
644 *Arabidopsis ABCE2* gene.



645 **ACKNOWLEDGEMENTS**

646 We thank J. Castelló, J.M. Serrano, and M.J. Níguez for their excellent technical assistance,  
647 and M. Sendra-Ortolà and I.C. Pomares-Bri for helping in the phenotypic analysis of *api7-1*  
648 and some gene constructs.

649

650 **FUNDING**

651 This work was supported by the Ministerio de Ciencia e Innovación of Spain [PID2019-  
652 105495GB-I00 (MCI/AEI/FEDER, UE), to V.R.; PGC2018-093445-B-I00 (MCI/AEI/FEDER,  
653 UE), to J.L.M]; and the Generalitat Valenciana [PROMETEO/2019/117, to J.L.M. and  
654 M.R.P.]. C.N.-Q. and E.M.B. held predoctoral fellowships from the Universidad Miguel  
655 Hernández [401PREDO] and the Ministerio de Educación, Cultura y Deporte of Spain  
656 [FPU13/00371], respectively. K.L. and J. Š. were funded by the Knut and Alice Wallenberg  
657 Foundation (KAW 2016.0341 and KAW 2016.0352) and the Swedish Governmental Agency  
658 for Innovation Systems (VINNOVA 2016-00504). Funding for open access charge:  
659 Universidad Miguel Hernández.

660 *Conflict of interest statement. None declared.*

661

662 **AUTHOR CONTRIBUTIONS**

663 J.L.M. conceived, designed, and supervised the research, provided resources, and  
664 obtained funding. Several experiments were codesigned by C.N.-Q., E.M.-B., and J.L.M.  
665 C.N.-Q. performed most of the experiments. E.M.-B. obtained the *ABCE2<sub>pro</sub>:ABCE2* and  
666 *35S<sub>pro</sub>:ABCE2:GFP* transgenes, and contributed to the phenotypic analysis of *api7-1*. E.M.-  
667 B. and H.C. obtained the *api7-1* as double mutants. C.N.-Q. and H.C. performed the  
668 phylogenetic analysis. H.C. and A.M.L. screened the Micol collection of leaf mutants for  
669 abnormal leaf venation patterns. P.R. performed preliminary morphometric analysis of cells  
670 and venation from *api7-1* leaves. J.Š. and K.L. performed the IAA metabolite profiling. Y.F.  
671 and V.R. performed the TAP assay. M.R.P., H.C., and E.M.-B. performed the mapping and  
672 cloning of the *api7-1* mutation. C.N.-Q. and J.L.M. wrote the manuscript. All authors revised  
673 and approved the manuscript.

674

675 **DATA AVAILABILITY**

676 The raw data from genome resequencing and RNA-seq were deposited in the Sequence  
677 Read Archive (<https://www.ncbi.nlm.nih.gov/sra/>) database under accession numbers  
678 SRP065876 and PRJNA719000, respectively.

679 **REFERENCES**

- 680 **Alhebshi A, Sideri TC, Holland SL, Avery SV. 2012.** The essential iron-sulfur protein Rli1  
681 is an important target accounting for inhibition of cell growth by reactive oxygen species.  
682 *Molecular Biology of the Cell* **23**: 3582-3590.
- 683 **Altschul SF, Madden TL, Schäffer AA, Zhang J, Zhang Z, Miller W, Lipman DJ. 1997.**  
684 Gapped BLAST and PSI-BLAST: a new generation of protein database search  
685 programs. *Nucleic Acids Research* **25**: 3389-3402.
- 686 **Arribas-Hernández L, Bressendorff S, Hansen MH, Poulsen C, Erdmann S, Brodersen**  
687 **P. 2018.** An m<sup>6</sup>A-YTH module controls developmental timing and morphogenesis in  
688 *Arabidopsis*. *Plant Cell* **30**: 952-967.
- 689 **Baima S, Nobili F, Sessa G, Lucchetti S, Ruberti I, Morelli G. 1995.** The expression of  
690 the *Athb-8* homeobox gene is restricted to provascular cells in *Arabidopsis thaliana*.  
691 *Development* **121**: 4171-4182.
- 692 **Barthelme D, Dinkelaker S, Albers SV, Londei P, Ermiler U, Tampé R. 2011.** Ribosome  
693 recycling depends on a mechanistic link between the FeS cluster domain and a  
694 conformational switch of the twin-ATPase ABCE1. *Proceedings of the National Academy*  
695 *of Sciences USA* **108**: 3228-3233.
- 696 **Barthelme D, Scheele U, Dinkelaker S, Janoschka A, MacMillan F, Albers SV,**  
697 **Driessen AJ, Stagni MS, Bill E, Meyer-Klaucke W, et al. 2007.** Structural organization  
698 of essential iron-sulfur clusters in the evolutionarily highly conserved ATP-binding  
699 cassette protein ABCE1. *Journal of Biological Chemistry* **282**: 14598-14607.
- 700 **Becker T, Franckenberg S, Wickles S, Shoemaker CJ, Anger AM, Armache JP, Sieber**  
701 **H, Ungewickell C, Berninghausen O, Daberkow I, et al. 2012.** Structural basis of  
702 highly conserved ribosome recycling in eukaryotes and archaea. *Nature* **482**: 501-506.
- 703 **Berná G, Robles P, Micol JL. 1999.** A mutational analysis of leaf morphogenesis in  
704 *Arabidopsis thaliana*. *Genetics* **152**: 729-742.
- 705 **Bisbal C, Martinand C, Silhol M, Lebleu B, Salehzada T. 1995.** Cloning and  
706 characterization of a RNase L inhibitor. A new component of the interferon-regulated 2-  
707 5A pathway. *Journal of Biological Chemistry* **270**: 13308-13317.
- 708 **Braz AS, Finnegan J, Waterhouse P, Margis R. 2004.** A plant orthologue of RNase L  
709 inhibitor (RLI) is induced in plants showing RNA interference. *Journal of Molecular*  
710 *Evolution* **59**: 20-30.
- 711 **Briat JF, Duc C, Ravet K, Gaymard F. 2010.** Ferritins and iron storage in plants.  
712 *Biochimica et Biophysica Acta* **1800**: 806-814.
- 713 **Bühler J, Rishmawi L, Pflugfelder D, Huber G, Scharr H, Hülskamp M, Koornneef M,**  
714 **Schurr U, Jahnke S. 2015.** phenoVein—A tool for leaf vein segmentation and analysis.  
715 *Plant Physiology* **169**: 2359-2370.

- 716 **Byrne ME. 2009.** A role for the ribosome in development. *Trends in Plant Science* **14**: 512-  
717 519.
- 718 **Candela H, Martínez-Laborda A, Micol JL. 1999.** Venation pattern formation in  
719 *Arabidopsis thaliana* vegetative leaves. *Developmental Biology* **205**: 205-216.
- 720 **Casanova-Sáez R, Candela H, Micol JL. 2014.** Combined haploinsufficiency and purifying  
721 selection drive retention of *RPL36a* paralogs in Arabidopsis. *Scientific Reports* **4**: 4122.
- 722 **Casanova-Sáez R, Mateo-Bonmatí E, Ljung K. 2021.** Auxin metabolism in plants. *Cold*  
723 *Spring Harbor Perspectives in Biology* **13**: a039867.
- 724 **Clough SJ, Bent AF. 1998.** Floral dip: a simplified method for *Agrobacterium*-mediated  
725 transformation of *Arabidopsis thaliana*. *Plant Journal* **16**: 735-743.
- 726 **Coaker G, Zhu G, Ding Z, Van Doren SR, Staskawicz B. 2006.** Eukaryotic cyclophilin as  
727 a molecular switch for effector activation. *Molecular Microbiology* **61**: 1485-1496.
- 728 **Colca JR, McDonald WG, Waldon DJ, Leone JW, Lull JM, Bannow CA, Lund ET,**  
729 **Mathews WR. 2004.** Identification of a novel mitochondrial protein ("mitoNEET") cross-  
730 linked specifically by a thiazolidinedione photoprobe. *American Journal of Physiology:*  
731 *Endocrinology and Metabolism* **286**: 252-260.
- 732 **Curtis MD, Grossniklaus U. 2003.** A Gateway cloning vector set for high-throughput  
733 functional analysis of genes in planta. *Plant Physiology* **133**: 462-469.
- 734 **Chen ZQ, Dong J, Ishimura A, Daar I, Hinnebusch AG, Dean M. 2006.** The essential  
735 vertebrate ABCE1 protein interacts with eukaryotic initiation factors. *Journal of Biological*  
736 *Chemistry* **281**: 7452-7457.
- 737 **Cheng Y, Dai X, Zhao Y. 2007.** Auxin synthesized by the YUCCA flavin monooxygenases  
738 is essential for embryogenesis and leaf formation in *Arabidopsis*. *Plant Cell* **19**: 2430-  
739 2439.
- 740 **Dever TE, Dinman JD, Green R. 2018.** Translation elongation and recoding in eukaryotes.  
741 *Cold Spring Harbor Perspectives in Biology* **10**: a032649.
- 742 **Earley KW, Haag JR, Pontes O, Opper K, Juehne T, Song K, Pikaard CS. 2006.**  
743 Gateway-compatible vectors for plant functional genomics and proteomics. *Plant Journal*  
744 **45**: 616-629.
- 745 **Edgar RC. 2004a.** MUSCLE: a multiple sequence alignment method with reduced time and  
746 space complexity. *BMC Bioinformatics* **5**: 113.
- 747 **Edgar RC. 2004b.** MUSCLE: multiple sequence alignment with high accuracy and high  
748 throughput. *Nucleic Acids Research* **32**: 1792-1797.
- 749 **Eide D, Broderius M, Fett J, Gueriot ML. 1996.** A novel iron-regulated metal transporter  
750 from plants identified by functional expression in yeast. *Proceedings of the National*  
751 *Academy of Sciences USA* **93**: 5624-5628.

- 752 **Faus I, Niñoles R, Kesari V, Llabata P, Tam E, Nebauer SG, Santiago J, Hauser MT,**  
753 **Gadea J. 2018.** Arabidopsis ILITHYIA protein is necessary for proper chloroplast  
754 biogenesis and root development independent of eIF2 $\alpha$  phosphorylation. *Journal of Plant*  
755 *Physiology* **224-225**: 173-182.
- 756 **García-León M, Iniesto E, Rubio V. 2018.** Tandem affinity purification of protein  
757 complexes from Arabidopsis cell cultures. *Methods in Molecular Biology* **1794**: 297-309.
- 758 **Gouridis G, Hetzert B, Kiosze-Becker K, de Boer M, Heinemann H, Nürnberg-Goloub**  
759 **E, Cordes T, Tampé R. 2019.** ABCE1 controls ribosome recycling by an asymmetric  
760 dynamic conformational equilibrium. *Cell Reports* **28**: 723-734.
- 761 **Heisler MG, Ohno C, Das P, Sieber P, Reddy GV, Long JA, Meyerowitz EM. 2005.**  
762 Patterns of auxin transport and gene expression during primordium development  
763 revealed by live imaging of the Arabidopsis inflorescence meristem. *Current Biology* **15**:  
764 1899-1911.
- 765 **Hellen CUT. 2018.** Translation termination and ribosome recycling in eukaryotes. *Cold*  
766 *Spring Harbor Perspectives in Biology* **10**: a032656.
- 767 **Heuer A, Gerovac M, Schmidt C, Trowitzsch S, Preis A, Kötter P, Berninghausen O,**  
768 **Becker T, Beckmann R, Tampé R. 2017.** Structure of the 40S-ABCE1 post-splitting  
769 complex in ribosome recycling and translation initiation. *Nature Structural and Molecular*  
770 *Biology* **24**: 453-460.
- 771 **Hooper CM, Castleden IR, Tanz SK, Aryamanesh N, Millar AH. 2017.** SUBA4: the  
772 interactive data analysis centre for Arabidopsis subcellular protein locations. *Nucleic*  
773 *Acids Research* **45**: 1064-1074.
- 774 **Hooper CM, Tanz SK, Castleden IR, Vacher MA, Small ID, Millar AH. 2014.** SUBAcon:  
775 a consensus algorithm for unifying the subcellular localization data of the *Arabidopsis*  
776 proteome. *Bioinformatics* **30**: 3356-3364.
- 777 **Hopfner KP. 2012.** Rustless translation. *Biological Chemistry* **393**: 1079-1088.
- 778 **Horiguchi G, Mollá-Morales A, Pérez-Pérez JM, Kojima K, Robles P, Ponce MR, Micol**  
779 **JL, Tsukaya H. 2011.** Differential contributions of ribosomal protein genes to  
780 *Arabidopsis thaliana* leaf development. *Plant Journal* **65**: 724-736.
- 781 **Huang DW, Sherman BT, Lempicki RA. 2009a.** Bioinformatics enrichment tools: paths  
782 toward the comprehensive functional analysis of large gene lists. *Nucleic Acids Research*  
783 **37**: 1-13.
- 784 **Huang DW, Sherman BT, Lempicki RA. 2009b.** Systematic and integrative analysis of  
785 large gene lists using DAVID bioinformatics resources. *Nature Protocols* **4**: 44-57.
- 786 **Izquierdo Y, Kulasekaran S, Benito P, López B, Marcos R, Cascón T, Hamberg M,**  
787 **Castresana C. 2018.** Arabidopsis *nonresponding to oxylipins* locus NOXY7 encodes a

- 788 yeast GCN1 homolog that mediates noncanonical translation regulation and stress  
789 adaptation. *Plant, Cell and Environment* **41**: 1438-1452.
- 790 **Kärblane K, Gerassimenko J, Nigul L, Piirsoo A, Smialowska A, Vinkel K, Kylsten P,**  
791 **Ekwall K, Swoboda P, Truve E, et al. 2015.** ABCE1 is a highly conserved RNA silencing  
792 suppressor. *PLOS ONE* **10**: e0116702.
- 793 **Karcher A, Büttner K, Märtens B, Jansen RP, Hopfner KP. 2005.** X-ray structure of RLI,  
794 an essential twin cassette ABC ATPase involved in ribosome biogenesis and HIV capsid  
795 assembly. *Structure* **13**: 649-659.
- 796 **Karcher A, Schele A, Hopfner KP. 2008.** X-ray structure of the complete ABC enzyme  
797 ABCE1 from *Pyrococcus abyssi*. *Journal of Biological Chemistry* **283**: 7962-7971.
- 798 **Kashima I, Takahashi M, Hashimoto Y, Sakota E, Nakamura Y, Inada T. 2014.** A  
799 functional involvement of ABCE1, eukaryotic ribosome recycling factor, in nonstop  
800 mRNA decay in *Drosophila melanogaster* cells. *Biochimie* **106**: 10-16.
- 801 **Kim D, Paggi JM, Park C, Bennett C, Salzberg SL. 2019.** Graph-based genome alignment  
802 and genotyping with HISAT2 and HISAT-genotype. *Nature Biotechnology* **37**: 907-915.
- 803 **Kirli K, Karaca S, Dehne HJ, Samwer M, Pan KT, Lenz C, Urlaub H, Görlich D. 2015.** A  
804 deep proteomics perspective on CRM1-mediated nuclear export and nucleocytoplasmic  
805 partitioning. *eLIFE* **4**: e11466.
- 806 **Kleinboelting N, Huet G, Kloetgen A, Viehoveer P, Weisshaar B. 2012.** GABI-Kat  
807 SimpleSearch: new features of the *Arabidopsis thaliana* T-DNA mutant database.  
808 *Nucleic Acids Research* **40**: D1211-1215.
- 809 **Kneuper I, Teale W, Dawson JE, Tsugeki R, Katifori E, Palme K, Ditengou FA. 2021.**  
810 Auxin biosynthesis and cellular efflux act together to regulate leaf vein patterning. *Journal*  
811 *of Experimental Botany* **72**: 1151-1165.
- 812 **Kougioumoutzi E, Cartolano M, Canales C, Dupré M, Bramsiepe J, Vlad D, Rast M,**  
813 **Ioio RD, Tattersall A, Schnittger A, et al. 2013.** SIMPLE LEAF3 encodes a ribosome-  
814 associated protein required for leaflet development in *Cardamine hirsuta*. *Plant Journal*  
815 **73**: 533-545.
- 816 **Kratzat H, Mackens-Kiani T, Ameismeier M, Potocnjak M, Cheng J, Dacheux E,**  
817 **Namane A, Berninghausen O, Herzog F, Fromont-Racine M, et al. 2021.** A structural  
818 inventory of native ribosomal ABCE1-43S pre-initiation complexes. *EMBO Journal* **40**:  
819 e105179.
- 820 **Kumar S, Stecher G, Li M, Knyaz C, Tamura K. 2018.** MEGA X: Molecular Evolutionary  
821 Genetics Analysis across computing platforms. *Molecular Biology and Evolution* **35**:  
822 1547-1549.



- 823 **Lanquar V, Lelièvre F, Bolte S, Hamès C, Alcon C, Neumann D, Vansuyt G, Curie C,**  
824 **Schröder A, Krämer U, et al. 2005.** Mobilization of vacuolar iron by AtNRAMP3 and  
825 AtNRAMP4 is essential for seed germination on low iron. *EMBO Journal* **24**: 4041-4051.
- 826 **Li J, Wang Y, Zheng L, Li Y, Zhou X, Li J, Gu D, Xu E, Lu Y, Chen X, et al. 2019.** The  
827 intracellular transporter AtNRAMP6 is involved in Fe homeostasis in *Arabidopsis*.  
828 *Frontiers in Plant Science* **10**: 1124.
- 829 **Love MI, Huber W, Anders S. 2014.** Moderated estimation of fold change and dispersion  
830 for RNA-seq data with DESeq2. *Genome Biology* **15**: 550.
- 831 **Madeira F, Park YM, Lee J, Buso N, Gur T, Madhusoodanan N, Basutkar P, Tivey ARN,**  
832 **Potter SC, Finn RD, et al. 2019.** The EMBL-EBI search and sequence analysis tools  
833 APIs in 2019. *Nucleic Acids Research* **47**: 636-641.
- 834 **Mancera-Martínez E, Brito Querido J, Valasek LS, Simonetti A, Hashem Y. 2017.**  
835 ABCE1: A special factor that orchestrates translation at the crossroad between recycling  
836 and initiation. *RNA Biology* **14**: 1279-1285.
- 837 **Mateo-Bonmatí E, Casanova-Sáez R, Candela H, Micol JL. 2014.** Rapid identification of  
838 *angulata* leaf mutations using next-generation sequencing. *Planta* **240**: 1113-1122.
- 839 **Mateo-Bonmatí E, Casanova-Sáez R, Quesada V, Hricová A, Candela H, Micol JL.**  
840 **2015.** Plastid control of abaxial-adaxial patterning. *Scientific Reports* **5**: 15975.
- 841 **Mateo-Bonmatí E, Casanova-Sáez R, Šimura J, Ljung K. 2021.** Broadening the roles of  
842 UDP-glycosyltransferases in auxin homeostasis and plant development. *New*  
843 *Phytologist* **232**: 642-654.
- 844 **Mateo-Bonmatí E, Esteve-Bruna D, Juan-Vicente L, Nadi R, Candela H, Lozano FM,**  
845 **Ponce MR, Pérez-Pérez JM, Micol JL. 2018.** *INCURVATA11* and *CUPULIFORMIS2*  
846 are redundant genes that encode epigenetic machinery components in *Arabidopsis*.  
847 *Plant Cell* **30**: 1596-1616.
- 848 **Mellor N, Band LR, Pěňčík A, Novák O, Rashed A, Holman T, Wilson MH, Voß U,**  
849 **Bishopp A, King JR, et al. 2016.** Dynamic regulation of auxin oxidase and conjugating  
850 enzymes *AtDAO1* and *GH3* modulates auxin homeostasis. *Proceedings of the National*  
851 *Academy of Sciences USA* **113**: 11022-11027.
- 852 **Micol-Ponce R, Sarmiento-Mañús R, Fontcuberta-Cervera S, Cabezas-Fuster A, de**  
853 **Bures A, Sáez-Vásquez J, Ponce MR. 2020.** SMALL ORGAN4 is a ribosome  
854 biogenesis factor involved in 5.8S ribosomal RNA maturation. *Plant Physiology* **184**:  
855 2022-2039.
- 856 **Micol-Ponce R, Sarmiento-Mañús R, Ruiz-Bayón A, Montacié C, Sáez-Vasquez J,**  
857 **Ponce MR. 2018.** *Arabidopsis* RIBOSOMAL RNA PROCESSING7 is required for 18S  
858 rRNA maturation. *Plant Cell* **30**: 2855-2872.



- 859 **Moschopoulos A, Derbyshire P, Byrne ME. 2012.** The *Arabidopsis* organelle-localized  
860 glycyI-tRNA synthetase encoded by *EMBRYO DEFECTIVE DEVELOPMENT1* is  
861 required for organ patterning. *Journal of Experimental Botany* **63**: 5233-5243.
- 862 **Möttus J, Maiste S, Eek P, Truve E, Sarmiento C. 2020.** Mutational analysis of  
863 *Arabidopsis thaliana* ABCE2 identifies important motifs for its RNA silencing suppressor  
864 function. *Plant Biology* **23**: 21-31.
- 865 **Navarro-Quiles C, Mateo-Bonmatí E, Micol JL. 2018.** ABCE proteins: from molecules to  
866 development. *Frontiers in Plant Science* **9**: 1125.
- 867 **Nechushtai R, Conlan AR, Harir Y, Song L, Yogev O, Eisenberg-Domovich Y, Livnah  
868 O, Michaeli D, Rosen R, Ma V, et al. 2012.** Characterization of *Arabidopsis* NEET  
869 reveals an ancient role for NEET proteins in iron metabolism. *Plant Cell* **24**: 2139-2154.
- 870 **Novák O, Hényková E, Sairanen I, Kowalczyk M, Pospíšil T, Ljung K. 2012.** Tissue-  
871 specific profiling of the *Arabidopsis thaliana* auxin metabolome. *Plant Journal* **72**: 523-  
872 536.
- 873 **Nürenberg-Goloub E, Heinemann H, Gerovac M, Tampé R. 2018.** Ribosome recycling is  
874 coordinated by processive events in two asymmetric ATP sites of ABCE1. *Life Science  
875 Alliance* **1**: e201800095.
- 876 **Nürenberg-Goloub E, Kratzat H, Heinemann H, Heuer A, Kötter P, Berninghausen O,  
877 Becker T, Tampé R, Beckmann R. 2020.** Molecular analysis of the ribosome recycling  
878 factor ABCE1 bound to the 30S post-splitting complex. *EMBO Journal* **39**: e103788.
- 879 **Nürenberg-Goloub E, Tampé R. 2019.** Ribosome recycling in mRNA translation, quality  
880 control, and homeostasis. *Biological Chemistry* **401**: 47-61.
- 881 **Paul VD, Mühlenhoff U, Stümpfig M, Seebacher J, Kugler KG, Renicke C, Taxis C,  
882 Gavin AC, Pierik AJ, Lill R. 2015.** The deca-GX<sub>3</sub> proteins Yae1-Lto1 function as  
883 adaptors recruiting the ABC protein Rli1 for iron-sulfur cluster insertion. *eLIFE* **4**: e08231.
- 884 **Pěncík A, Casanova-Sáez R, Pilařová V, Žukauskaitė A, Pinto R, Micol JL, Ljung K,  
885 Novák O. 2018.** Ultra-rapid auxin metabolite profiling for high-throughput mutant  
886 screening in *Arabidopsis*. *Journal of Experimental Botany* **69**: 2569-2579.
- 887 **Pérez-Pérez JM, Rubio-Díaz S, Dhondt S, Hernández-Romero D, Sánchez-Soriano J,  
888 Beemster GT, Ponce MR, Micol JL. 2011.** Whole organ, venation and epidermal cell  
889 morphological variations are correlated in the leaves of *Arabidopsis* mutants. *Plant, Cell  
890 and Environment* **34**: 2200-2211.
- 891 **Pinon V, Etchells JP, Rossignol P, Collier SA, Arroyo JM, Martienssen RA, Byrne ME.  
892 2008.** Three *PIGGYBACK* genes that specifically influence leaf patterning encode  
893 ribosomal proteins. *Development* **135**: 1315-1324.
- 894 **Ponce MR, Quesada V, Micol JL. 1998.** Rapid discrimination of sequences flanking and  
895 within T-DNA insertions in the *Arabidopsis* genome. *Plant Journal* **14**: 497-501.

- 896 **Ponce MR, Robles P, Lozano FM, Brotóns MA, Micol JL. 2006.** Low-resolution mapping  
897 of untagged mutations. *Methods in Molecular Biology* **323**: 105-113.
- 898 **Ponce MR, Robles P, Micol JL. 1999.** High-throughput genetic mapping in *Arabidopsis*  
899 *thaliana*. *Molecular and General Genetics* **261**: 408-415.
- 900 **Porco S, Pěncík A, Rashed A, Voß U, Casanova-Sáez R, Bishopp A, Golebiowska A,**  
901 **Bhosale R, Swarup R, Swarup K, et al. 2016.** Dioxygenase-encoding *AtDAO1* gene  
902 controls IAA oxidation and homeostasis in *Arabidopsis*. *Proceedings of the National*  
903 *Academy of Sciences USA* **113**: 11016-11021.
- 904 **Poza-Viejo L, del Olmo I, Crevillén P. 2019.** Plant chromatin immunoprecipitation v.2.  
905 *protocols.io*: 25468.
- 906 **Preis A, Heuer A, Barrio-Garcia C, Hauser A, Eyler DE, Berninghausen O, Green R,**  
907 **Becker T, Beckmann R. 2014.** Cryoelectron microscopic structures of eukaryotic  
908 translation termination complexes containing eRF1-eRF3 or eRF1-ABCE1. *Cell Reports*  
909 **8**: 59-65.
- 910 **Prusty NR, Camponeschi F, Ciofi-Baffoni S, Banci L. 2021.** The human YAE1-ORAOV1  
911 complex of the cytosolic iron-sulfur protein assembly machinery binds a [4Fe-4S] cluster.  
912 *Inorganica Chimica Acta* **518**: 120252.
- 913 **Quesada V, Ponce MR, Micol JL. 2000.** Genetic analysis of salt-tolerant mutants in  
914 *Arabidopsis thaliana*. *Genetics* **154**: 421-436.
- 915 **Reyt G, Boudouf S, Boucherez J, Gaymard F, Briat JF. 2015.** Iron- and ferritin-dependent  
916 reactive oxygen species distribution: impact on *Arabidopsis* root system architecture.  
917 *Molecular Plant* **8**: 439-453.
- 918 **Robinson NJ, Procter CM, Connolly EL, Guerinot ML. 1999.** A ferric-chelate reductase  
919 for iron uptake from soils. *Nature* **397**: 694-697.
- 920 **Robles P, Fleury D, Candela H, Cnops G, Alonso-Peral MM, Anami S, Falcone A,**  
921 **Caldana C, Willmitzer L, Ponce MR, et al. 2010.** The *RON1/FRY1/SAL1* gene is  
922 required for leaf morphogenesis and venation patterning in *Arabidopsis*. *Plant Physiology*  
923 **152**: 1357-1372.
- 924 **Robles P, Micol JL. 2001.** Genome-wide linkage analysis of *Arabidopsis* genes required  
925 for leaf development. *Molecular Genetics and Genomics* **266**: 12-19.
- 926 **Rodnina MV. 2018.** Translation in prokaryotes. *Cold Spring Harbor Perspectives in Biology*  
927 **10**: a032664.
- 928 **Rosado A, Li R, van de Ven W, Hsu E, Raikhel NV. 2012.** *Arabidopsis* ribosomal proteins  
929 control developmental programs through translational regulation of auxin response  
930 factors. *Proceedings of the National Academy of Sciences USA* **109**: 19537-19544.
- 931 **Saitou N, Nei M. 1987.** The neighbor-joining method: a new method for reconstructing  
932 phylogenetic trees. *Molecular Biology and Evolution* **4**: 406-425.

- 933 **Sánchez-Fernández R, Davies TG, Coleman JO, Rea PA. 2001.** The *Arabidopsis thaliana*  
934 ABC protein superfamily, a complete inventory. *Journal of Biological Chemistry* **276**:  
935 30231-30244.
- 936 **Sarmiento C, Nigul L, Kazantseva J, Buschmann M, Truve E. 2006.** AtRLI2 is an  
937 endogenous suppressor of RNA silencing. *Plant Molecular Biology* **61**: 153-163.
- 938 **Scutenaire J, Deragon JM, Jean V, Benhamed M, Raynaud C, Favory JJ, Merret R,**  
939 **Bousquet-Antonelli C. 2018.** The YTH domain protein ECT2 is an m<sup>6</sup>A reader required  
940 for normal trichome branching in *Arabidopsis*. *Plant Cell* **30**: 986-1005.
- 941 **Schindelin J, Arganda-Carreras I, Frise E, Kaynig V, Longair M, Pietzsch T, Preibisch**  
942 **S, Rueden C, Saalfeld S, Schmid B, et al. 2012.** Fiji: an open-source platform for  
943 biological-image analysis. *Nature Methods* **9**: 676-682.
- 944 **Schmittgen TD, Livak KJ. 2008.** Analyzing real-time PCR data by the comparative C<sub>T</sub>  
945 method. *Nature Protocols* **3**: 1101-1108.
- 946 **Sesma A, Castresana C, Castellano MM. 2017.** Regulation of translation by TOR, eIF4E  
947 and eIF2 $\alpha$  in plants: current knowledge, challenges and future perspectives. *Frontiers in*  
948 *Plant Science* **8**: 644.
- 949 **Shao S, von der Malsburg K, Hegde RS. 2013.** Listerin-dependent nascent protein  
950 ubiquitination relies on ribosome subunit dissociation. *Molecular Cell* **50**: 637-648.
- 951 **Shirokikh NE, Preiss T. 2018.** Translation initiation by cap-dependent ribosome  
952 recruitment: Recent insights and open questions. *Wiley Interdisciplinary Reviews: RNA*  
953 **9**: e1473.
- 954 **Simonetti A, Guca E, Bochler A, Kuhn L, Hashem Y. 2020.** Structural insights into the  
955 mammalian late-stage initiation complexes. *Cell Reports* **31**: 107497.
- 956 **Sudmant PH, Lee H, Dominguez D, Heiman M, Burge CB. 2018.** Widespread  
957 accumulation of ribosome-associated isolated 3' UTRs in neuronal cell populations of  
958 the aging brain. *Cell Reports* **25**: 2447-2456.
- 959 **Van Leene J, Eeckhout D, Cannoot B, De Winne N, Persiau G, Van De Slijke E,**  
960 **Vercruysse L, Dedecker M, Verkest A, Vandepoele K, et al. 2015.** An improved  
961 toolbox to unravel the plant cellular machinery by tandem affinity purification of  
962 *Arabidopsis* protein complexes. *Nature Protocols* **10**: 169-187.
- 963 **Veitia RA. 2017.** Gene duplicates: agents of robustness or fragility? *Trends in Genetics* **33**:  
964 377-379.
- 965 **Verna C, Ravichandran SJ, Sawchuk MG, Linh NM, Scarpella E. 2019.** Coordination of  
966 tissue cell polarity by auxin transport and signaling. *eLIFE* **8**: e51061.
- 967 **Verrier PJ, Bird D, Burla B, Dassa E, Forestier C, Geisler M, Klein M, Kolukisaoglu Ü,**  
968 **Lee Y, Martinoia E, et al. 2008.** Plant ABC proteins – a unified nomenclature and  
969 updated inventory. *Trends in Plant Science* **13**: 151-159.

- 970 **Wang L, Li H, Zhao C, Li S, Kong L, Wu W, Kong W, Liu Y, Wei Y, Zhu JK, et al. 2017.**  
971 The inhibition of protein translation mediated by AtGCN1 is essential for cold tolerance  
972 in *Arabidopsis thaliana*. *Plant, Cell and Environment* **40**: 56-68.
- 973 **Wei LH, Song P, Wang Y, Lu Z, Tang Q, Yu Q, Xiao Y, Zhang X, Duan HC, Jia G. 2018.**  
974 The m<sup>6</sup>A reader ECT2 controls trichome morphology by affecting mRNA stability in  
975 *Arabidopsis*. *Plant Cell* **30**: 968-985.
- 976 **Weis BL, Kovacevic J, Missbach S, Schleiff E. 2015.** Plant-specific features of ribosome  
977 biogenesis. *Trends in Plant Science* **20**: 729-740.
- 978 **Wellburn AR. 1994.** The spectral determination of chlorophylls *a* and *b*, as well as total  
979 carotenoids, using various solvents with spectrophotometers of different resolution.  
980 *Journal of Plant Physiology* **144**: 307-313.
- 981 **Yao Y, Ling Q, Wang H, Huang H. 2008.** Ribosomal proteins promote leaf adaxial identity.  
982 *Development* **135**: 1325-1334.
- 983 **Young DJ, Guydosh NR. 2019.** Hcr1/eIF3j is a 60S ribosomal subunit recycling accessory  
984 factor *in vivo*. *Cell Reports* **28**: 39-50.
- 985 **Young DJ, Guydosh NR, Zhang F, Hinnebusch AG, Green R. 2015.** Rli1/ABCE1  
986 recycles terminating ribosomes and controls translation reinitiation in 3'UTRs *in vivo*. *Cell*  
987 **162**: 872-884.
- 988 **Zandalinas SI, Song L, Sengupta S, McInturf SA, Grant DG, Marjault HB, Castro-**  
989 **Guerrero NA, Burks D, Azad RK, Mendoza-Cozatl DG, et al. 2020.** Expression of a  
990 dominant-negative AtNEET-H89C protein disrupts iron–sulfur metabolism and iron  
991 homeostasis in *Arabidopsis*. *Plant Journal* **101**: 1152-1169.
- 992 **Zhai C, Li Y, Mascarenhas C, Lin Q, Li K, Vyrides I, Grant CM, Panaretou B. 2014.** The  
993 function of ORAOV1/LTO1, a gene that is overexpressed frequently in cancer: essential  
994 roles in the function and biogenesis of the ribosome. *Oncogene* **33**: 484-494.
- 995 **Zhang J, Lin JE, Harris C, Campos Mastrotti Pereira F, Wu F, Blakeslee JJ, Peer WA.**  
996 **2016.** DAO1 catalyzes temporal and tissue-specific oxidative inactivation of auxin in  
997 *Arabidopsis thaliana*. *Proceedings of the National Academy of Sciences USA* **113**:  
998 11010-11015.
- 999 **Zhang L, Cai X, Wu J, Liu M, Grob S, Cheng F, Liang J, Cai C, Liu Z, Liu B, et al. 2018.**  
1000 Improved *Brassica rapa* reference genome by single-molecule sequencing and  
1001 chromosome conformation capture technologies. *Horticulture Research* **5**: 50.
- 1002 **Zhu X, Zhang H, Mendell JT. 2020.** Ribosome recycling by ABCE1 links lysosomal function  
1003 and iron homeostasis to 3' UTR-directed regulation and nonsense-mediated decay. *Cell*  
1004 *Reports* **32**: 107895.
- 1005
- 1006

1007 **SUPPORTING INFORMATION**

1008 Additional supporting information may be found in the online version of this article.

1009

1010 **Fig. S1** Primary root length, inflorescence and silique morphological phenotypes, and  
1011 pigment content in leaves of *Ler*, *api7-1*, and *api7-1 ABCE2<sub>pro</sub>:ABCE2* plants.

1012 **Fig. S2** Leaf cell phenotypes of *Ler*, *api7-1*, and *api7-1 ABCE2<sub>pro</sub>:ABCE2* plants.

1013 **Fig. S3** Some details of the vascular phenotype of first- and third-node leaves from *Ler* and  
1014 *api7-1* plants.

1015 **Fig. S4** Venation pattern of *api7-1* cotyledons, cauline leaves, sepals, and petals.

1016 **Fig. S5** Vascularization in *api7-1* leaf primordia.

1017 **Fig. S6** Genetic interactions of *api7-1* with *as1-1* and *as2-1*.

1018 **Fig. S7** Sequence conservation among ABCE orthologs.

1019 **Fig. S8** *api7-2* is a lethal allele of *ABCE2*.

1020 **Fig. S9** Phylogenetic analysis of some Rosidae *ABCE* genes.

1021 **Fig. S10** *ABCE1* and *ABCE2* expression analyses.

1022 **Fig. S11** The *35S<sub>pro</sub>:ABCE1* transgene restores the wild-type phenotype in *api7-1* plants.

1023 **Fig. S12** The *35S<sub>pro</sub>:ABCE2:YFP* transgene fully restores the wild-type phenotype in *api7-*  
1024 *1* plants.

1025 **Fig. S13** Amino acid sequences of proteins identified by LC-ESI-MS/MS in co-  
1026 immunoprecipitated *ABCE2:YFP* protein.

1027 **Fig. S14** Tissue profiling of IAA metabolites in *api7-1* seedlings.

1028 **Fig. S15** Expression levels of some genes deregulated in *api7-1* plants.

1029 **Table S1** Primer sets used in this work.

1030 **Table S2** Excitation and detection parameters of fluorophores.

1031 **Table S3** Quality control summary of the RNA-seq assay.

1032 **Table S4** NCBI accession numbers of the sequences used for phylogenetic analysis.

1033 **Table S5** Morphometry of the leaf venation pattern of the *api7-1* mutant.

1034 **Table S6** Mutations identified in the *api7-1* candidate interval.

1035 **Table S7** *ABCE2* interactors identified in a co-immunoprecipitation assay.

1036 **Table S8** Conservation level and described functions of putative *ABCE2* interactors.

1037 **Data Set 1** Proteins identified in an *ABCE2:YFP* co-immunoprecipitation assay.

1038 **Data Set 2** Proteins identified in a GSRhino-TAP-tagged *ABCE2* fusion tandem affinity  
1039 purification assay.

1040 **Data Set 3** Genes deregulated in an RNA-seq analysis of *api7-1* plants and gene ontology  
1041 term enrichment analysis.

Navarro-Quiles *et al.*, Figure 1

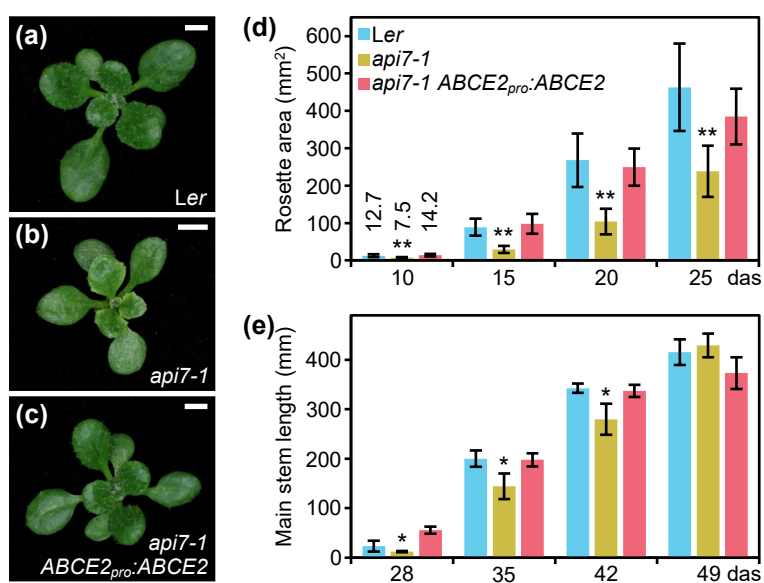

**Fig. 1** Morphological phenotype of the *api7-1* mutant. (a–c) Rosettes from (a) the wild-type Ler, (b) the *api7-1* mutant, and (c) an *api7-1 ABCE2<sub>pro</sub>:ABCE2* mutant and transgenic plant. Pictures were taken 16 days after stratification (das). Scale bars indicate 2 mm. (d,e) Growth progression of (d) rosette area and (e) main stem length. Bars indicate (d) mean and (e) median values. Error bars represent (d) standard deviation and (e) median absolute deviation. Asterisks indicate a significant difference with Ler in a (d) Student's *t* test ( $10 < n < 17$ ) or (e) Mann-Whitney *U* test ( $n = 8$ ) ( $*P < 0.05$ ,  $**P < 0.001$ ).



Navarro-Quiles *et al.*, Figure 2

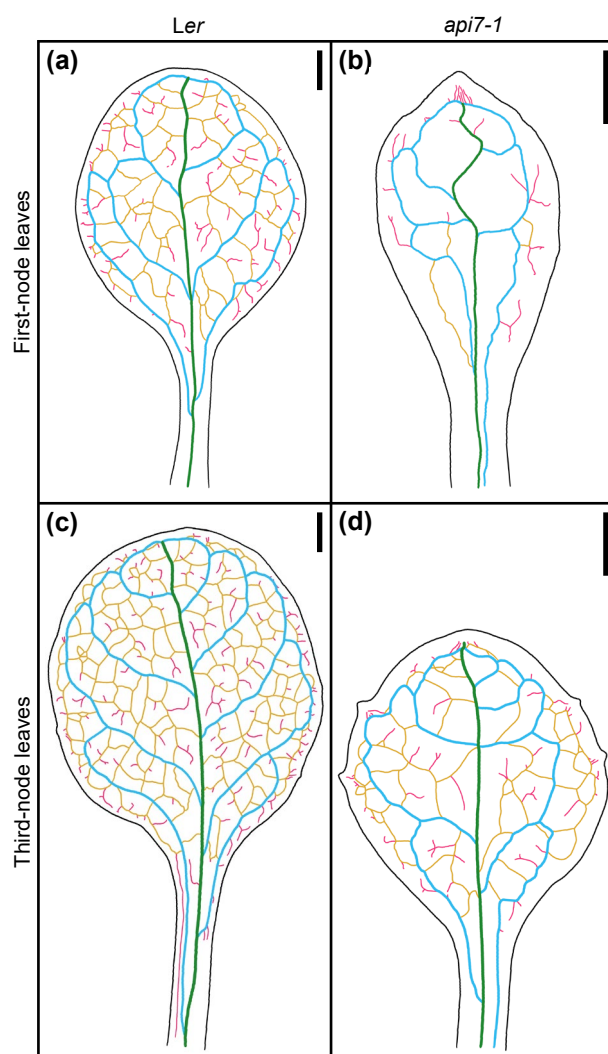

**Fig. 2** Venation pattern of *api7-1* first- and third-node leaves. Representative diagrams of mature (a,b) first- and (c,d) third-node leaves from (a,c) *Ler* and (b,d) *api7-1* plants. Margins were drawn in black, primary veins in green, secondary veins in blue, higher-order connected veins in yellow, and higher-order disconnected veins in pink. Organs were collected 21 das. Scale bars indicate 1 mm.

Navarro-Quiles *et al.*, Figure 3

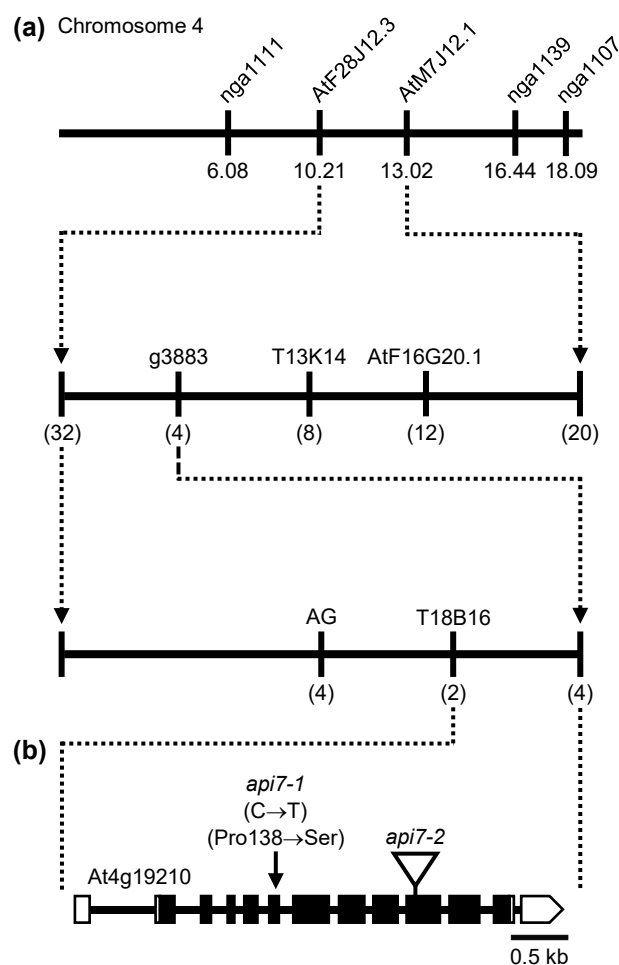

**Fig. 3** Fine mapping by linkage analysis of the *api7-1* mutation. (a) A mapping population of 273  $F_2$  plants derived from an *api7-1* × Col-0 cross allowed us to delimit a candidate region of 123.5 kb in chromosome 4, flanked by the *T18B16* and *g3883* markers. The names and physical map positions of the molecular markers used for linkage analysis are shown. All values outside parentheses indicate Mb. The number of recombinant chromosomes found (from a total of 546 chromosomes analyzed) is indicated in parentheses. (b) Structure of the *At4g19210* (*ABCE2*) gene, located within the candidate region, with indication of the nature and position of the *api7* mutations studied in this work. Boxes and lines indicate exons and introns, respectively. White boxes represent UTRs. The arrow indicates the *api7-1* point mutation. The triangle indicates the *api7-2* T-DNA insertion (*GABI\_509C06*).

Navarro-Quiles *et al.*, Figure 4

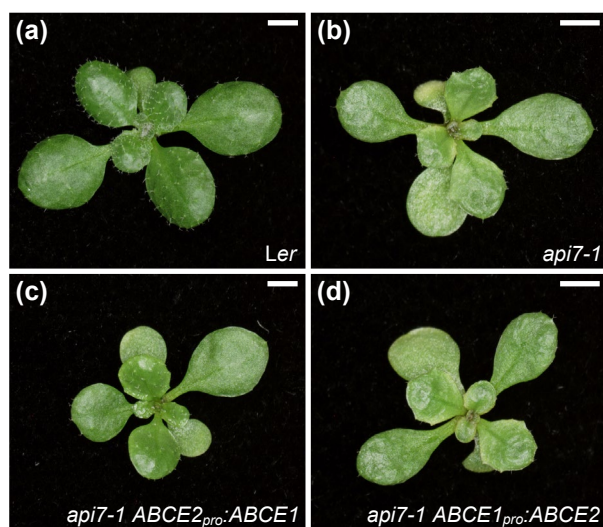

**Fig. 4** Effects of the  $ABCE2_{pro}:ABCE1$  and  $ABCE1_{pro}:ABCE2$  transgenes on the morphological phenotype of the *api7-1* mutant. Rosettes from (a) Ler, (b) *api7-1*, (c) *api7-1 ABCE2<sub>pro</sub>:ABCE1*, and (d) *api7-1 ABCE1<sub>pro</sub>:ABCE2* plants. Pictures were taken 14 das. Scale bars indicate 2 mm.

Navarro-Quiles *et al.*, Figure 5

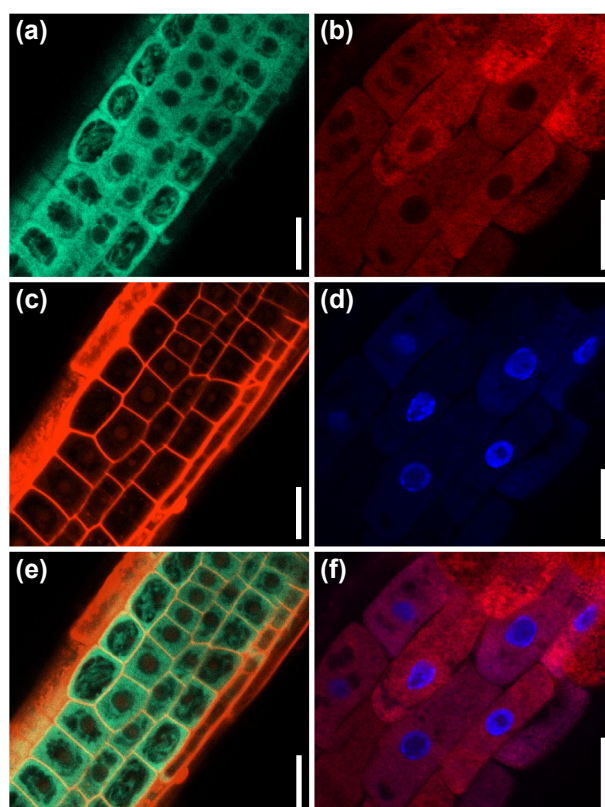

**Fig. 5** Subcellular localization of the ABCE2 protein in cells from the root elongation zone. Confocal laser scanning micrographs of (a,c,e) *Ler 35S<sub>pro</sub>:ABCE2:GFP* and (b,d,f) *api7-1 35S<sub>pro</sub>:ABCE2:YFP* transgenic plants. Fluorescent signals correspond to (a) GFP, (b) YFP, (c) propidium iodide, and (d) DAPI staining, and (e,f) the overlay of (e) GFP and propidium iodide, and (f) YFP and DAPI. Pictures were taken (a,c,e) 14 and (b,d,f) 5 das. Scale bars indicate 20  $\mu\text{m}$ .

Navarro-Quiles *et al.*, Figure 6

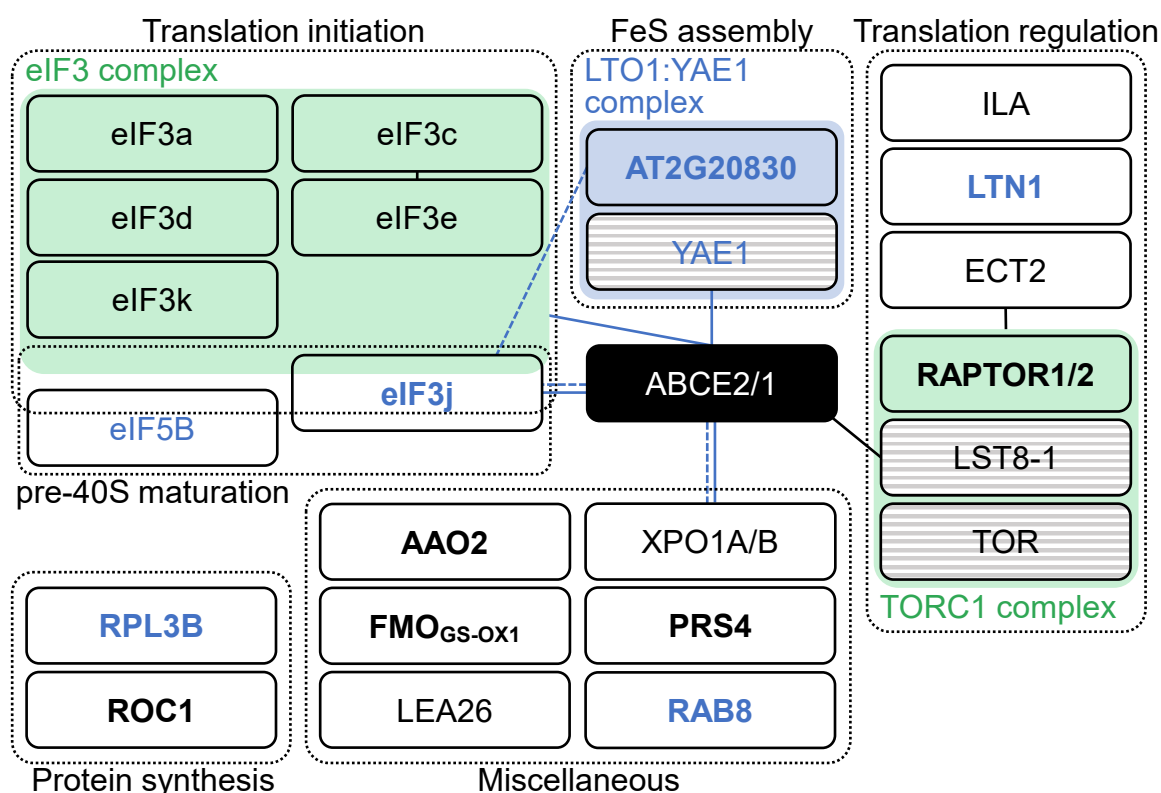

**Fig. 6** Proteins identified in an ABCE2:YFP co-immunoprecipitation assay. Proteins were grouped within dashed boxes according to their annotated functions for Arabidopsis (names in black letters) or orthologous (names in blue letters) proteins. Green and blue boxes represent complexes that have been described in Arabidopsis and other species, respectively. Proteins in striped boxes were not identified in our assay but have been included in this figure because they are known to belong to a given complex. Continuous and dashed lines connecting boxes indicate physical and genetic interactions described elsewhere for Arabidopsis (black) or other species (blue), respectively. For references, see Table S8. Names in bold and plain letters indicate proteins unique to or enriched in ABCE2:YFP samples, respectively.

Navarro-Quiles *et al.*, Figure 7

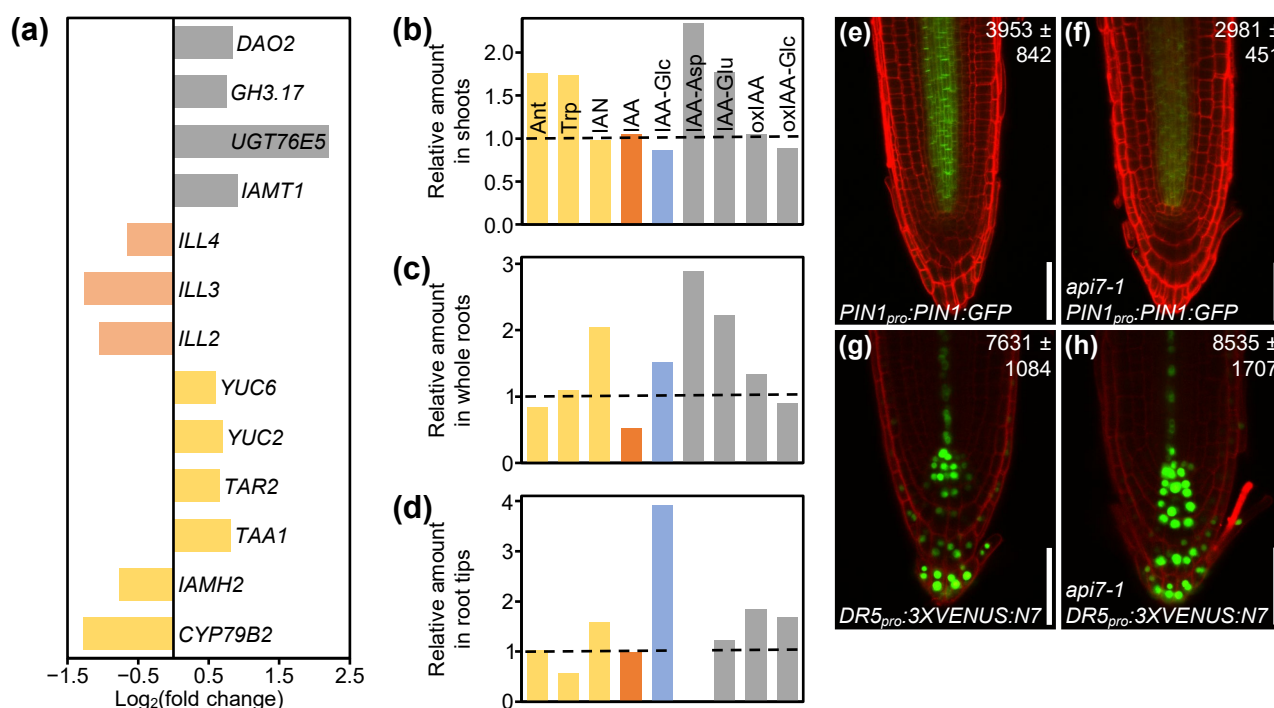

**Fig. 7** Auxin metabolism, transport and signaling are altered in *api7-1* plants. (a) Expression levels of genes related to auxin metabolism (biosynthesis, yellow; activation, pale orange; storage and catabolism, grey) in *api7-1* shoots 14 das. Values are shown as the binary logarithm of the foldchange between *api7-1* and *Ler* mean reads. Mean reads were calculated from three biological replicates. (b–d) Relative amounts of some IAA precursors (yellow), IAA (orange), the IAA storage molecule IAA-Glc (blue), and IAA catabolites (grey) in *api7-1* (b) shoots, (c) whole roots, and (d) root tips 9 das. IAA-Asp was not detected in root tips. The mean amounts of each metabolite in *Ler* were used as the reference value (dashed lines; see Fig. S14). Mean amounts were calculated from four biological replicates. (e–h) Visualization of the expression of reporter transgenes for auxin (e,f) transport and (g,h) perception, in (e,g) wild-type and (f,h) *api7-1* roots. Cell walls were stained with propidium iodide. Values indicate average fluorescence intensities ± standard deviation from (e,f) GFP and (g,h) VENUS, which are significantly different from the wild type in a Student's *t* test [(e,f)  $P < 0.001$ ,  $n = 25$ ; (g,h)  $P < 0.05$ ,  $n = 27$ ]. Pictures were taken 5 das. Scale bars indicate 50  $\mu$ m.
